# Compensatory mutation can drive gene regulatory network evolution

Yifei Wang<sup>1,2,\*</sup>, Marios Richards<sup>3</sup>, Steve Dorus<sup>4</sup>, Nicholas K. Priest<sup>5,\*;§</sup>, Joanna J. Bryson<sup>3,6,\*;§</sup>

January 15, 2020

1. School Biological Sciences, Georgia Institute of Technology, Atlanta, USA
2. The Institute for Data Engineering and Science (IDEaS), Georgia Institute of Technology, Atlanta, USA
3. Artificial Intelligence Group, Department of Computer Science, University of Bath, Bath, UK
4. Department of Biology, Syracuse University, Syracuse, USA
5. Milner Centre for Evolution, Department of Biology and Biochemistry, University of Bath, Bath, UK
6. Hertie School of Governance, Berlin, Germany

\*: corresponding authors; §: co-final authors

## Abstract

Gene regulatory networks underlie every aspect of life; better understanding their assembly would better our understanding of evolution more generally. For example, evolutionary theory typically assumed that low-fitness intermediary pathways are not a significant factor in evolution, yet there is substantial empirical evidence of compensatory mutation. Here we revise theoretical assumptions to explore the possibility that compensatory mutation may drive rapid evolutionary recovery. Using a well-established *in silico* model of gene regulatory networks, we show that assuming only that deleterious mutations are not fatal, compensatory mutation is surprisingly frequent. Further, we find that it entails biases that drive the evolution of regulatory pathways. In our simulations, we find compensatory mutation to be common during periods of relaxed selection, with 8-15% of degraded networks having regulatory function restored by a single randomly-generated additional mutation. Though this process reduces average robustness, proportionally higher robustness is found in networks where compensatory mutations occur close to the deleterious mutation site, or where the compensatory mutation results in a large regulatory effect size. This location- and size-specific robustness systematically biases which networks are purged by selection for network stability, producing emergent changes to the population of regulatory networks. We show that over time, large-effect and co-located mutations accumulate, assuming only that episodes of relaxed selection occur, even very rarely. This accumulation results in an increase in regulatory complexity. Our findings help explain a process by which large-effect mutations structure complex regulatory networks, and may account for the speed and pervasiveness of observed occurrence of compensatory mutation, for example in the context of antibiotic resistance, which we discuss. If sustained by *in vitro* experiments, these results promise a significant breakthrough in the understanding of evolutionary and regulatory processes.

## 1 Introduction

Gene regulatory networks are the internal tools living organism employ to facilitate resilience to environmental variation. Unfortunately, to date their evolution is not well understood [Wilke and Adami, 2001, Wilke et al., 2003, Beerenwinkel et al., 2007, Lehner, 2011, Rokyta et al., 2011, Park and Lehner, 2013]. Prior theory building based on computational and mathematical models has shown that gene regulatory networks (GRNs) can evolve by adaptive responses to direct selection [Ciliberti et al., 2007, Crombach and Hogeweg, 2008, Romero and Arnold, 2009, Tsuda and Kawata, 2010, Olson-Manning et al., 2012, Cotterell and Sharpe, 2013], and by random genetic drift when sampling biases shift the distribution of networks [cf. Wagner and Wright, 2007, Lynch et al., 2016].

In contrast, the role of compensatory mutation in GRN evolution has been given little consideration. In most modelling, regulatory networks rendered unfunctional (unstable) by deleterious mutation have been assumed to be immediately purged by direct selection, precluding the possibility of an additional mutation which might restore fitness. Yet in nature, phenotypic selection is known to be episodic, with periods of strong and weak selection [Siepielski et al., 2009a]. This indicates there may be sufficient time for evolutionary rescue. Further, if compensatory mutation happens frequently enough, it could play a major role in GRN evolution. Compensatory mutation has been observed to occur surprisingly frequently in some laboratory contexts under high selective pressure, particularly with respect to antibiotic resistance [Dunai et al., 2019, Moura de Sousa et al., 2017], see Remigi et al. [2019] for a recent review. This indicates that compensatory mutation should receive more theoretical attention.

Compensatory mutation could contribute to GRN evolution as an emergent consequence of biases that occur in the processes of mutation and selection. Although originally considered an important source of innovation and diversity, mutations are now thought generally to be in the vast majority of cases at least mildly deleterious, decreasing individual fitness. However, not all mutations are deleterious or have the same detrimental effects on all individuals. There are occasionally beneficial mutations, including compensatory mutations that recover fitness after deleterious mutations [Kulathinal et al., 2004, Piskol and Stephan, 2008, Covert et al., 2013]. Such mutations could contribute to gene pathway evolution [Kimura, 1985, Moore et al., 2000, Levin et al., 2000, Choi et al., 2005, Meer et al., 2010]. However, in contrast to adaptive and neutral evolution, little attention has been placed on evolutionary dynamics driven by genes that at least initially code lower-than-average reproductive success.

Compensatory mutation in regulatory networks may be far more frequent than we expect. Outside of the context of a regulatory network, theory tells us compensatory mutation is not likely to play an important role in evolution [Wright, 1931a,b, Stephan, 1996, Parsch et al., 1997, Whitlock and Otto, 1999, Whitlock

33 et al., 2003, Zhang and Watson, 2009]. This is because the frequency of deleterious mutation is low and  
34 the frequency at which a new mutation compensates for the previous deleterious mutation is expected to be  
35 even lower. Furthermore, if the compensatory mutation restores fitness, then its probability of fixation in  
36 the population might be assumed to be the same as any allele under drift, the inverse of twice the effective  
37 population size [Wright, 1931a, Charlesworth, 2009]. This analysis may be incorrect though, given the  
38 coupling to the original deleterious mutation, particularly if the ‘deleterious’ mutation provides a specialist  
39 ability to an organism despite overall lowering its adaptive value. This is the reported case in antibiotic  
40 resistance, where initial mutations confer resistance but create other metabolic costs. Some proportion  
41 of bacteria evolve compensatory mutations rather than reverting to initial genotype [Dunai et al., 2019],  
42 and some even seem to be conferred with net adaptive advantage after the event of additional mutations  
43 [Moura de Sousa et al., 2017]. Further, mutations do not only happen in independently-acting genes, but  
44 also in genetic networks where there are many sites of complex interactions that could be mutated. If a  
45 deleterious mutation occurs at a locus that is not presently subjected to strong selective pressure, then  
46 as long as a compensatory mutation occurs before the lineage is driven to extinction, it may restore the  
47 lineage’s fitness. Thus, understanding the frequency and nature of compensatory mutations is of substantial  
48 importance to understanding their impact on pathway evolution.

49 Logically, we can expect relaxed selection to be critical to the frequency of compensatory mutation.  
50 Empirical evidence indicates that when selection against deleterious mutation is relaxed, the frequency of  
51 compensatory mutation in organisms carrying deleterious mutations is surprisingly high [Maisnier-Patin  
52 et al., 2002, Gifford and MacLean, 2013]. Several recent empirical studies have suggested that various  
53 sorts of relaxed selection facilitate compensatory mutation [Sloan et al., 2014, Moura de Sousa et al., 2017,  
54 Dunai et al., 2019]. Compensatory mutations might then be expected to play a key role in the formation  
55 of GRN. The frequency at which deleterious mutations incapacitate gene regulatory pathways is likely to  
56 be substantially higher than that for an independently acting gene, because there will inevitably be many  
57 more possible sites to mutate. We do not know the frequency at which mutations in incapacitated networks  
58 can compensate for previous deleterious mutations. But because mutation, by definition, occurs in networks  
59 that were previously functional, it seems logical that there could be a wide range of mutational sites and  
60 magnitudes that might restore the function of a network. If the frequency of compensatory mutation is  
61 high and persistent enough over time, then there is a high probability that some compensatory mutations  
62 will be maintained, even if solely by drift. If there is something special about the sorts of genes likely  
63 to produce compensation, then we might also expect this process to generate biases, both with respect to  
64 where mutations occur and any other characteristic that might engender higher robustness. Variation in the  
65 speed with which poorly functioning genotypes are removed by purifying natural selection could ultimately

66 have substantial impacts on the genetic attributes of the population. Similarly, properties associated with  
67 compensatory mutations may accumulate over time. The basic logic of this argument is that, facilitated by  
68 periods of relaxed selection, compensatory mutation not only allows evolution to proceed, but results in it  
69 proceeding *differently*. GRN may accumulate specific features as a consequence of compensatory mutation.

70 The gene regulatory network paradigm is an excellent system in which to test this question. Most  
71 importantly, it explicitly incorporates genetic interactions in an evolutionary framework. Simulation allows us  
72 to generate thousands upon thousands of networks of different sizes and connectivities, which we could not do  
73 with *in vivo* approaches, and makes it relatively simple to identify, track and understand the properties of all  
74 of the compensatory mutations within those networks. Many previous computational studies have focused on  
75 the evolution of gene regulatory networks under constant selection [Azevedo et al., 2006, Ciliberti et al., 2007,  
76 Crombach and Hogeweg, 2008, Tsuda and Kawata, 2010, Cotterell and Sharpe, 2013]. However, constant  
77 selection necessarily constrains pathway evolution because it removes the low-fitness individuals who carry  
78 incapacitated gene networks. This in turn eliminates the potentially significant mechanism of compensatory  
79 mutation. Compensatory mutation is impossible under one of the dominant modelling frameworks, where  
80 unstable networks — networks whose phenotype never reach an equilibrium state — are always labelled as  
81 ‘unviable’ and therefore never subjected to further rounds of mutation [Wagner, 1996, Siegal and Bergman,  
82 2002, Azevedo et al., 2006, Lohaus et al., 2010]. If we instead allow unstable networks to stay in the  
83 population when selection for network stability is relaxed, compensatory mutation is possible and able to  
84 allow lineages access to a greater variety of evolutionary pathways.

85 In our experiments, we adapted the experimental paradigm for one of the dominant models of GRN  
86 evolution, to consider deleterious mutations to only compromise, not destroy, a lineage. This allows us to  
87 examine the prevalence and impacts of compensatory mutation. We find that compensatory mutations are  
88 both surprisingly common, and that their frequency is relatively invariant to the scale of the network. We  
89 also find that compensatory mutations exhibit biases both in effect size, and in location with respect to the  
90 deleterious mutation. The accumulation of these emergent biases increases regulatory complexity in GRN  
91 over generations. As we discuss, these observations are all congruent with empirical observations, indicating  
92 we may have established a useful theoretical advance in the understanding of compensatory mutation and  
93 of GRN.

## 94 Results

### 95 A network model for compensatory evolution

96 We present a model to study compensatory mutation, using a process well-established in the literature  
97 (see more details in Methods). As with published precedent on gene regulatory network (GRN) evolution,  
98 the model generates an initial population of stable regulatory networks and networks made unfunctional  
99 (unstable) by deleterious mutation [Wagner, 1996, Siegal and Bergman, 2002, Azevedo et al., 2006, Wang  
100 et al., 2015, Wang, 2019a,b]. Our innovation is that instead of assuming that unfunctional networks are  
101 removed immediately by persistent selection for network stability, we assume that they are part of a larger  
102 organism and only marginally reduce that organism’s fitness. In this, we effectively hypothesise that organ-  
103 isms carry a deleterious mutation (DM) load, analogous to parasite load. We compute the consequences of  
104 additional rounds of mutation on the stability of the network, during periods labelled as bouts of relaxed  
105 selection (Fig. 1).

106 Though the criteria for network stability we employ is similar to that used in previous models, our  
107 fitness function—the relationship between genotype and fitness—is different. Specifically, we assume that  
108 networks are either functional (high fitness, equivalent to fitness 1 in previous models) or unfunctional  
109 (low fitness, replacing fitness 0 in previous models). We then estimate the rate of compensatory mutation  
110 by calculating the proportion of regulatory networks which have stability restored by a single additional  
111 mutation, represented by the blue circle in Fig. 1A. Note that the green circle represents that the network  
112 has experienced a neutral mutation that does not affect network stability. Thus in Step 1 we generate a  
113 random population of GRNs. In Step 2 (Fig. 1B), each GRN has been mutated (red edge) and the resulting  
114 unstable networks have been collected for further testing. In Step 3, the unstable networks have undergone  
115 a second round of mutation, allowing the collection and analysis of any newly-stable networks. In this case,  
116 one network’s mutation has been compensatory (blue edge).

117 Fig. 1C shows an initially-stable gene network which contains five genes:  $A-E$ . Each edge is directed  
118 and indicates the strength (weight) of the influence on one gene of another. In the Deleterious Mutation  
119 Phase, a mutation occurs on  $\overrightarrow{CA}$  (red edge), which leads to the failure of maintaining network stability. In  
120 the Compensatory Mutation Phase, the compromised network is recovered by another round of mutation,  
121 with a mutation that proves compensatory (blue edge) occurring on  $\overrightarrow{CE}$ . Note that there is no difference in  
122 the modelling process between generating a compensatory or deleterious mutation. Rather, random changes  
123 to the network are categorised based on their impact on network stability.

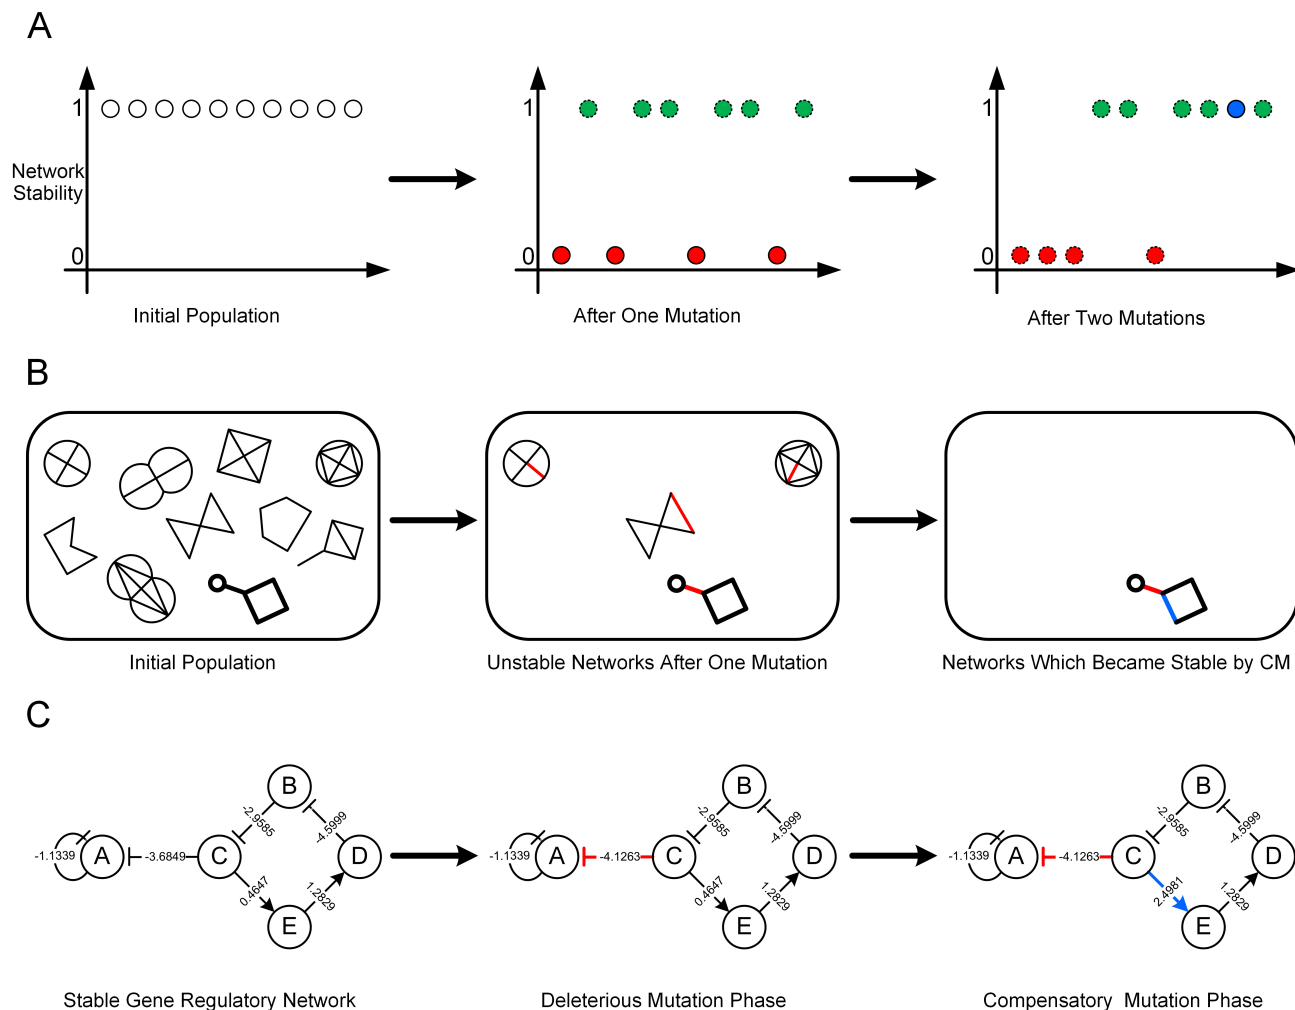

Figure 1: **Overview across time of the computational model for exploring characteristics of compensatory mutation.** (A) Stability (approximates fitness contribution) of gene regulatory networks in a population. Note that dashed circles are networks no longer considered for the study. (B) The population pool of gene regulatory networks. Note that a red edge indicates a deleterious mutation and a blue edge a compensatory mutation. (C) Detailed view of a single network.

## 124 Compensatory mutations are common and relatively scale-invariant

125 We first test whether compensatory mutation is common in the context of the synthetic GRNs. We  
 126 find that, unlike deleterious mutation, the frequency of compensatory mutation is almost scale-invariant.  
 127 From Fig. S1A and B, we can see that the stability and robustness in initial networks are quite different  
 128 among varying sizes and levels of connectivity of gene regulatory networks. Which type of network, once  
 129 compromised, more frequently experiences compensatory mutation? Fig. 2 answers this question. As can be  
 130 seen, the patterns of frequency of compensatory mutation depend on network size. For the smaller networks  
 131  $N = 5, 10, 15$  and  $20$ , the compensatory mutation rates continuously increase as network connectivity

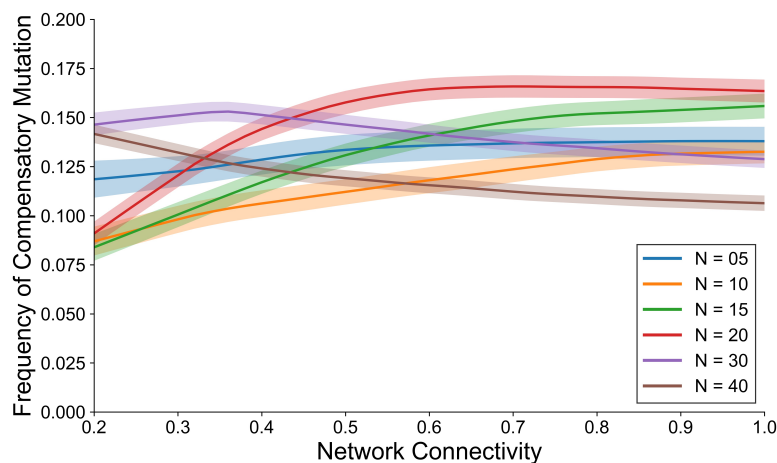

Figure 2: **The frequency of compensatory mutation is relatively insensitive to network size and network connectivity in the context of gene regulatory networks.** For each network size ( $N = 5, 10, 15, 20, 30$  and  $40$  genes) for each value of network connectivity (proportion of regulatory relationships) given from a range of values in continuous intervals ( $[0.2, 1]$ , step size  $0.02$ ), the frequency of experiencing first deleterious followed by a compensatory mutation on just two rounds of mutation was tested based on an initial  $10,000$  randomly generated stable gene networks. The shaded areas represent  $95\%$  confidence intervals based on  $100$  independent runs.

132 increases, but very gradually. In contrast, for the larger networks  $N = 30$  and  $40$ , with the rise in connectivity,  
133 the compensatory mutation rates decrease slightly. However, overall the results indicate that the frequency  
134 of individuals that can be fixed by compensatory mutation is more sensitive to network size than to network  
135 connectivity, and not particularly sensitive to either. The implied probability of compensatory mutation  
136 from the relative frequencies observed ranges from  $8\%$  to  $15\%$  of compromised networks recovering, with the  
137 larger rates associated with larger networks. This marked scale-invariance (see Fig. S1C, which is identical  
138 to Fig. 2 but re-scaled) stands in contrast to the scale dependencies shown for deleterious mutations in  
139 Fig. S1A and B.

140 Next, we investigate the occurrence of compensatory mutations in populations that have been exposed  
141 to bouts of generations of relaxed selection and selection for network stability. Again as a slight modification  
142 of what is standard for this type of model, we assume selection favours network stability. We find that  
143 compensatory mutation occurs in both evolutionary scenarios. From Fig. S2A, we can see that compensatory  
144 mutation is able to occur even in highly stable networks that have been subjected to network stability selection  
145 for many generations. In addition, the compensation probability tends to be constant after many rounds of  
146 mutation. Furthermore, we find that, across network sizes, all populations still maintain a high diversity in  
147 the presence of selection for network stability, and for many generations (see Appendix). It is not surprising  
148 therefore to see that, as shown in Fig. S2B, compensatory mutation can occur in the mixed populations (stable



149 and unstable networks) that result from a relaxed selection regime, although it is less pronounced there and  
150 declines significantly over rounds of selection. Interestingly, we found that compensatory mutation can still  
151 fix seriously damaged networks that have suffered many deleterious mutations over generations. Here we  
152 select for study only the broken networks after each mutation round, as shown in Fig. S2C. Compensatory  
153 mutations will restore, for example, about 14% of networks for  $N = 5$  that are broken by one round of  
154 mutation, but the frequency of compensation quickly drops to mutation restoring the stability of only 5%  
155 broken networks that have had many deleterious mutations for up to 15 generations. This indicates that  
156 compensatory mutations can still be cure-alls even for even seriously damaged networks, or at least those  
157 long neglected by selection for network stability.

158 Finally, we investigate the impact of relaxed selection on compensatory mutations. We find that, as  
159 expected, we can observe more compensatory mutations in the presence of relaxed selection for network sta-  
160 bility. Specifically, we performed simulations to measure the number of compensatory mutations in lineages  
161 for which relaxed selection occurs in different likelihoods. From Fig. S3, we see that the number of compen-  
162 satory mutations markedly increases as the consequence of having more generations of relaxed selection. We  
163 can also see that smaller networks typically have more compensatory mutations compared with larger net-  
164 works. This is because compromised networks with smaller sizes are more likely to experience compensation  
165 after lengthy evolution, though larger networks tend to have a higher frequency of compensatory mutation  
166 at early stages as indicated in Fig. 2.

## 167 **Compensatory mutations exhibit bias in location and size**

168 Given a model capable of generating compensatory mutation, we next characterise their nature. In  
169 general, there is little difference between a compensatory mutation and a deleterious mutation — in fact, the  
170 exact same mutation could be deleterious in one network and compensatory in another. However, compared  
171 to a completely random baseline, we find evidence that compensatory mutations tend to be biased with  
172 respect to the location in the network and the magnitude of gene regulatory effects.

173 We first look at where compensatory mutations happened in compromised networks. We find that they  
174 are more likely to occur at or close to the site of the original, deleterious mutation. In a typical small  
175 network with size  $N = 5$  genes (see Fig. S4A), we found a 95.8% chance that a mutation that occurs on  
176 the exact site of a deleterious mutation compensates for it. The frequency of compensatory mutation is  
177 also high on most of the edges close to the original mutation site. Mutations on edges far away from the  
178 deleterious mutation site are much less likely to experience compensation. The same basic pattern is also  
179 seen in a larger network with size  $N = 20$  genes (see Fig. S4B), where the frequency of mutations being

180 compensatory, if they occur on the original deleterious site, is 85%. The percentages beside each edge in  
181 these figures indicate the proportion of mutations that occur on that edge that are compensatory, out of the  
182 1,000 simulated second rounds of mutation we ran on each edge for each network after it had previously  
183 suffered a single deleterious mutation. In general, as these representative figures indicate, the compensatory  
184 effect could happen in many positions in a broken network, but it is more likely to be observed at sites that  
185 are close to a deleterious mutation's site.

186 Fig. 3A (solid line) demonstrates the generality of the result indicated in Fig. S4. It illustrates the  
187 frequency among 10,000 initially-stable gene networks of compensatory mutation against different spatial  
188 distances from the single deleterious mutation suffered by each network. As can be seen, compensatory  
189 mutations generally occur in edges between genes close to the deleterious mutation site. We restrict the  
190 analysis to these five categories because there is only a narrow range of distribution distances for randomly  
191 sampled mutations (see Appendix for more details). We further conducted similar experiments for networks  
192 with neutral mutations to investigate whether compensatory mutations have any special property in terms of  
193 location. We found that, compared with the results of compensatory mutations, neutral mutations are more  
194 evenly distributed. Specifically, instead of measuring the frequency of a second, compensatory mutation (that  
195 restores network stability for a compromised network with a single deleterious mutation), we measure the  
196 frequency of a second, neutral mutation with different distance effects that retains the stability for a network  
197 that has already had one neutral mutation. From Fig. 3A (dashed line) we can see that the distance effect  
198 has a much less profound role in networks with two consecutive neutral mutations than in networks with  
199 one deleterious mutation and one compensatory mutation. In fact, neutral mutations tend to be enriched if  
200 they are far apart in larger networks (see Appendix).

201 The point of compensation is of course to recover the network's fitness, or here, stability. We therefore  
202 next investigate whether there is an impact on the robustness of networks after deleterious followed by com-  
203 pensatory mutation varies by the location of the compensatory mutation, and contrast this with differences  
204 in robustness after two neutral mutations. We again find that patterns are very dependent on location.  
205 Specifically, we compare robustness of stable networks following one round of deleterious and compensatory  
206 mutation with that of stable networks with two consecutive neutral mutations, as shown in Fig. 3C. In gen-  
207 eral, robustness is far higher when compensatory mutation occurs closer to the original deleterious mutation  
208 site (see the solid line in Fig. 3C), whereas after two neutral mutations, closer distances are not better asso-  
209 ciated with higher robustness (see the dashed line in Fig. 3C)<sup>1</sup>. Even though networks with compensatory  
210 mutations occurring near to the site of the deleterious mutation exhibit profoundly more robustness than

---

<sup>1</sup>Note that robustness is higher overall for networks having experienced two neutral mutations—this is unlikely to be caused by the mutations, and more likely to be a characteristic of the network likely to contain neutral mutations.

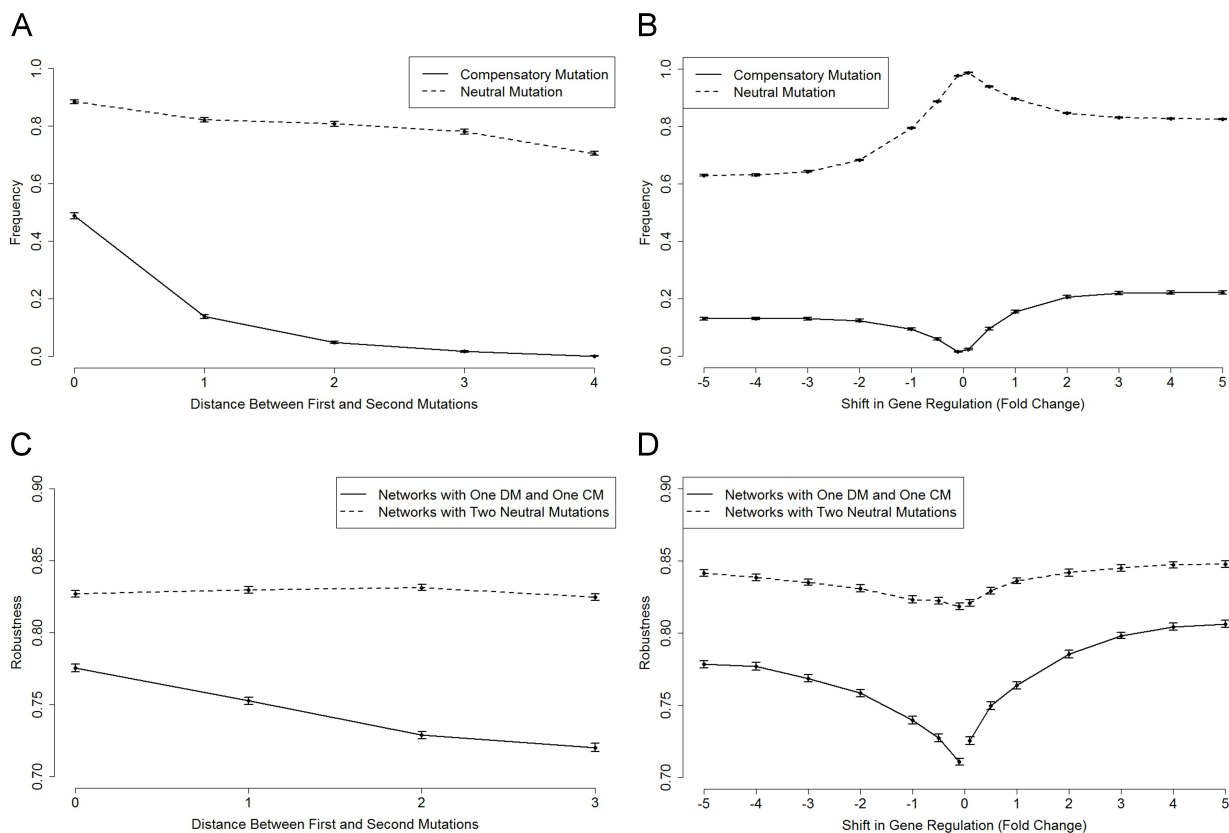

**Figure 3: Both frequency and robustness of networks with compensatory mutations exhibit biases in location and mutation size.** For  $N = 5$  and  $c = 0.4$ , we first collected a pool of compromised networks with deleterious mutations after a single mutation round. We then forced second mutations, classifying these as being 0 (on the same site), 1, 2, 3 and 4 steps away from the original deleterious mutations (A) or adding a weight from  $[-5, +5]$  (step size 0.5) to the original regulatory impact (B). For each of these distance or weight categories, we measured the probability that the mutation was compensatory (that it returned the network to stability, see solid lines in (A) and (B)), based on 10,000 sample networks collected for each category. The sample networks for control groups (see dashed lines in (A) and (B)) were collected in a similar way, except that the networks were subjected to two consecutive neutral mutations. Similarly, for  $N = 5$  and  $c = 0.4$ , we collected 10,000 sample stable networks that were subjected one deleterious mutation and then restored by one subsequent compensatory mutation that was 0, 1, 2 and 3 steps away from the previous deleterious mutation (C) or with different shifts in gene regulation from  $[-5, +5]$  (step size 1 and with four additional regulation shifts:  $-0.5, -0.1, 0.1$  and  $0.5$ ) (D). Then, we assessed the robustness of the sample networks at each category (see solid lines in (C) and (D)). The sample networks for control groups (see dashed lines in (C) and (D)) were collected in a similar way, except that the networks were subjected to two consecutive neutral mutations. Error bars represent 95% confidence intervals based on 100 independent runs.

211 those at other locations, their actual robustness is much lower than that of networks with neutral mutations  
 212 (see Fig. 3C and Appendix). Nevertheless, these theoretical results indicate that these co-localised compen-  
 213 satory mutations are more likely to be accumulated, whereas compensatory mutations that are far apart  
 214 from the previous deleterious mutations are more likely to be lost during subsequent selection for network

215 stability.

216 Independent of location, we also investigated how different mutation size influences the probability of com-  
217 pensation in compromised networks. We found that compensation is more likely to be driven by large-effect  
218 mutations. Fig. 3B (solid line) presents the frequency of compensatory mutation against various intensities  
219 of up or down regulation among 10,000 randomly-generated stable gene networks that had experienced a  
220 single deleterious mutation. For a randomly-chosen site in each network, we experimented with mutations  
221 across a range of regulatory strengths. As can be seen, larger regulation changes, both positive and negative,  
222 are up to a point associated with an increased frequency of compensatory mutation. However, the shape  
223 of the curve for compensatory mutations across all edges is not a symmetrical ‘V’. Rather, compensatory  
224 mutations occur more by positive changes to gene regulation than by negative changes. The explanation for  
225 this phenomenon is rooted in the fact that there are two edge types that can be affected by compensatory  
226 mutation: inter-gene regulation connecting two different genes and self-regulating edges. In the simulations,  
227 almost no compensatory mutations are both negative and self-regulating (see Appendix). The ‘V’ shape  
228 for only inter-gene regulation is almost symmetrical (see Appendix), suggesting that for these, negative and  
229 positive regulations are equally likely to be useful. It is true for both the negative and positive cases that  
230 compensatory mutation is increasingly likely with greater regulatory strength up to a certain extent.

231 Although we found that compensatory mutation tends to positive, this is not a property special only  
232 to compensatory mutations. From Fig. S5A, we can see that there is more positive regulation in both  
233 initially-stable networks and networks with compensatory mutations, whereas deleterious mutations in com-  
234 promised networks tend to be more negative. By separating self- and non-self-regulatory edges, we find that  
235 compensatory mutations have a larger effect (in terms of shifting gene regulation) on self-regulatory edges  
236 than non-self-regulatory edges (see Fig. S5B and C). We then conduct similar experiments for networks with  
237 neutral mutations to investigate whether compensatory mutations have any special property in terms of  
238 mutation size. We find that, compared with the results of compensatory mutations, small-size mutations are  
239 more likely to be observed in networks with neutral mutations. Specifically, similar to the location experi-  
240 ments, we measured the frequency of a second mutation (neutral mutation) with different mutation effects  
241 that can retain the stability for a network that has already had one neutral mutation. From Fig. 3B (dashed  
242 line) we can see that that neutral mutations are more likely to be of small magnitude than large, and where  
243 they are large they are more likely to be positive than negative. Compensatory mutations are more likely to  
244 be of large magnitude than small, but are also more likely to be positive than negative.

245 As with location, we also investigated the robustness of networks subject to mutations of different sizes.  
246 We found that patterns of shifting regulation-generating robustness are also quite different. Specifically,  
247 we compared robustness of stable networks having one deleterious mutation and compensatory mutation

248 with that of stable networks having two consecutive neutral mutations, as shown in Fig. 3D. In general, the  
249 robustness is significantly higher when compensatory mutation has a larger shift in gene regulation (see the  
250 solid line in Fig. 3D). Although networks with neutral mutations tend to have a similar pattern (see the  
251 dashed line in Fig. 3D), by measuring the percentage change in robustness (see Appendix), we can clearly  
252 see that size has a greater impact on robustness in compensatory mutations. Here again, it should also  
253 be noted that although networks with compensatory mutations exhibit a more profound biased change in  
254 robustness with respect to mutation size, their actual robustness is lower than that of networks with neutral  
255 mutations (see Fig. 3D). These theoretical results indicate that these large-effect compensatory mutations  
256 are more likely to be accumulated, whereas small-effect compensatory mutations are more likely to be lost  
257 by subsequent selection for network stability.

258 Note that similar patterns to those described here are also observed in networks with different sizes and  
259 connectivity. See more supporting figures in the Appendix.

## 260 **Compensatory mutation generates regulatory complexity**

261 We now explore the long-term evolutionary consequences of compensatory mutations. Given the biases  
262 identified in the previous section concerning location and magnitude, we might predict that the effects  
263 of these two fundamental network properties would facilitate an altered neutral evolution, at least during  
264 periods of relaxed selection. Recall that we assume such relaxed periods will be interspersed between bouts  
265 of selection for network stability, and also that selection in our model favours network stability. We in fact do  
266 observe in our simulations an increase in the complexity of gene regulatory networks, but only in a context  
267 where they have been withdrawn from the selection for network stability for at least some proportion of  
268 generations. Specifically, we first generate a pool of 10,000 stable networks ( $N = 10$ ) with a simple ‘Star’  
269 topology (see Fig. 4A), then evolve the population under different evolutionary scenarios. Fig. 4B shows four  
270 evolutionary scenarios where the population is exposed to selection for network stability in every generation  
271 such that there is no opportunity for compensatory mutation. From the typical results (networks with a  
272 median connectivity), we find that:

- 273 1. the median connectivity is the same as the initial population’s if it is evolved without mutation or  
274 recombination (only by drift),
- 275 2. the median connectivity decreases if evolved under either a mutation but no recombination regime or  
276 a recombination but no mutation regime (although the network structures are greatly altered when  
277 invoking only recombination), and

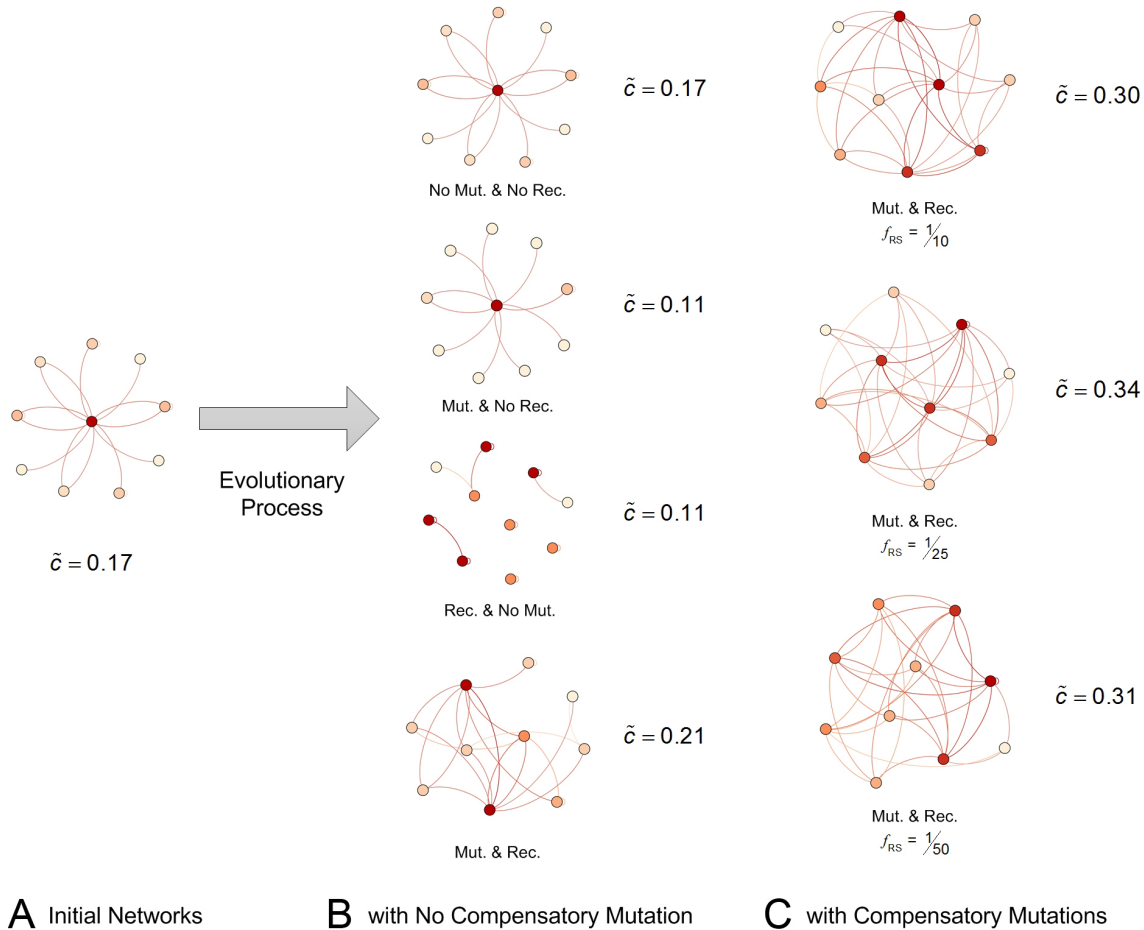

Figure 4: **Compensatory mutation generates regulatory complexity in stable networks without an initial variation in network structure.** The initial population pool was composed of 10,000 sample stable networks with  $N = 10$  genes. These networks had a similar “Star” topology (one hub node and nine non-hub nodes), varying network connectivity in  $[0.10, 0.26]$ . The detailed description of generating initial population can be found in Appendix. A representative network from the initial population is shown in (A). The initial population was evolved for 5000 generations with the selection for network stability ( $f_{RS} = 0$ ) under no mutation and no recombination regime, mutation but no recombination regime, recombination but no mutation regime, mutation and recombination regime (B). The initial population was also evolved for 5000 generations under relaxed selection regime (unstable networks will not be eliminated in generations under relaxed selection) with frequency  $f_{RS} = 1/10, 1/25, 1/50$  (C). Note that compensatory mutation cannot happen when the population is subject to selection for network stability, since no deleterious mutations survive to be compensated. The representative networks were selected randomly with a median connectivity in the evolved populations.

278 3. the median connectivity increases to an intermediate level if evolved under a regime allowing both  
 279 mutation and recombination.

280 Fig. 4C shows three evolutionary scenarios where the population is evolved with periods of relaxed  
 281 selection, invoking mutation (including compensatory mutation) and recombination. From these typical and  
 282 individual results (networks with a median connectivity), we can see that the median connectivity greatly

283 increases and is higher than in the case when the population is subjected exclusively to the selection for  
284 network stability so that no compensatory mutation can occur.

285 We would like to quantify the impact of relaxed selection on regulatory complexity. In another experiment,  
286 we collect 10,000 stable networks and then evolve them for 5,000 generations, allowing both mutation and  
287 recombination. From Fig. S6, we can see that if there is no relaxed selection at all, the mean connectivity  
288 of the population is highly preserved during evolution, whereas the network connectivity increases if we  
289 allow compensatory mutations to occur in periods of relaxed selection. It should be noted that in the first  
290 experiment, as shown in Fig. 4, we fix the network structure but vary the network connectivity in the  
291 initial population, whereas we fix the network connectivity but vary the network structure in this second  
292 experiment. These results demonstrate that selection for network stability where it impedes deleterious and  
293 compensatory mutations constricts complexity, whereas compensatory mutations contribute to regulatory  
294 complexity as a part of neutral process.

## 295 2 Discussion

296 Compensatory mutations have long been considered the primary means by which low-fitness lineages  
297 might be able to be restored to high fitness [Levin et al., 2000, Crawford et al., 2007, Meer et al., 2010].  
298 More recently, Dunai et al. [2019] suggest compensatory mutation may account for robust adoption of costly  
299 traits that are of critical importance to an organism in certain circumstances, such as antibiotic resistance.  
300 Given that most mutations are believed to be deleterious at least initially, some such process would be  
301 essential for mutation to contribute to genetic innovation and evolution more generally. However, the extent  
302 of the role of compensatory mutations has often been considered to be negligible because they were considered  
303 to be highly improbable and therefore rare. As such, they have not been studied extensively, and many of  
304 their general properties have been unknown.

305 If the results presented here in simulation hold for *in vivo* regulatory networks, then compensation  
306 may be far more probable and frequent than had previously been anticipated. Our results indicate that gene  
307 networks may by their nature be surprisingly robust, such that a wide variety of alterations to a compromised  
308 network may effect its recovery. Significantly, we find that the frequency of compensatory mutation — unlike  
309 deleterious mutations — is relatively invariant to the size of the network. This may mean that iterations  
310 of deleterious and compensatory mutation play a far larger role in evolution than previously thought. Our  
311 results provide a new account for why compensation can be so rapid, and also show a significant impact of  
312 effect size, both of which have been observed in the laboratory [Moura de Sousa et al., 2017, Dunai et al.,  
313 2019]. In fact, there is some indication that quasi-deleterious mutations such as initially-costly mutations

314 that promote antibiotic resistance, may produce a context wherein ‘compensatory’ mutations may find new  
315 adaptive fitness peaks, doing more therefore than mere compensation [Moura de Sousa et al., 2017].

316 Taylor et al. [2015] have shown that a regulatory network can be rapidly rewired through *de novo*  
317 compensatory mutation. In our simulations, we also observed that the compensatory mutation can facilitate  
318 regulatory complexity in terms of increasing network complexity (Fig. 4 and Fig. S6). Key in our simulations  
319 were periods where networks evolved under neutral processes driven by biases in compensatory mutation,  
320 since the regulatory complexity was not directly adaptively selected. Therefore, we believe compensatory  
321 mutations may be expected to play an essential role in driving regulatory complexity through neutral or  
322 non-adaptive processes.

323 Bouts of deleterious and compensatory mutations might well facilitate the transition of the regulatory  
324 network to new fitness peaks [Weinreich and Chao, 2005]. Compensatory mutations have been observed  
325 empirically to have a positive correlation with drug resistance mutations, where low-fitness lineages can create  
326 intrinsic selection pressure to mitigate their deleterious effects through compensatory mutations [Comas et al.,  
327 2012, Brandis et al., 2012, de Vos et al., 2013, Brandis and Hughes, 2013, Song et al., 2014, Dunai et al.,  
328 2019]. There is other supporting evidence that compensatory mutation can help the transition of lineages  
329 towards new fitness peaks [Martinez et al., 2014, Ivankov et al., 2014, Szamecz et al., 2014, Filteau et al.,  
330 2015]. Moreover, some studies also show that compensatory mutations can help increase plasmid stability,  
331 and thus facilitate adaptation [San Millan et al., 2014, Porter et al., 2015, Harrison et al., 2015]. Yet despite  
332 suggestions in the literature that peak shifts must occur through low-fitness genotypes [Wagner and Wright,  
333 2007, Romero and Arnold, 2009, Olson-Manning et al., 2012, Osada and Akashi, 2012, Barreto and Burton,  
334 2013], few theoretical studies have focused on how the formation of regulatory networks could be influenced  
335 by this process. We hope with our paper we have begun to redress this.

336 Historically, interactions in mutations *in vivo* have been considered hard to measure and the results  
337 usually have weak statistical significance [West et al., 1998, 1999], though see Moura de Sousa et al. [2017].  
338 Where measurement is difficult, exploration of theoretical possibilities through simulation offers an ideal  
339 means to identify and test for logically-coherent scientific hypotheses and to discover unanticipated conse-  
340 quences of these. These unanticipated consequences are predictions arising logically from the hypotheses the  
341 model expresses — predictions that can then inform our search for evidence *in vivo* [Bryson et al., 2007].  
342 The ability to observe and manipulate thousands of modelled individuals in a matter of hours allows for a  
343 systematic exploration of largely unknown theoretical territory. In this paper, the extension of the previous  
344 simulation approaches, while primarily conceptual, is potentially of great theoretical importance. Unlike  
345 the previous research seminal to our own [Wagner, 1996, Siegal and Bergman, 2002, Azevedo et al., 2006],  
346 we have been able to assess the probability and impact of compensatory mutations, providing important



347 theoretical underpinnings to explain known laboratory outcomes.

348 The use of binary fitness outcomes (0/1 for unstable/stable networks) that are only periodically tested  
349 by selection for network stability (selection for network stability) is operationally quite useful. This allows  
350 us to avoid making unrealistic assumptions about the selection coefficient distribution, and to proceed on  
351 the assumption that moderately deleterious mutations may persist long enough to allow the accumulation  
352 of subsequent mutations, some of which may prove to be compensatory or even advantageous. Periodic  
353 assessment of the functional operation of networks, i.e., periods of selection for network stability, is still a  
354 necessary practical consideration. The fluctuating selection regime (periods of selection for network stability)  
355 modelled in this paper is certainly biologically realistic. For example, Siepielski et al. [2009b] conclude that  
356 selection is usually fluctuating following their study of the temporal dynamics of selection in a database  
357 which contains 5,519 estimates of selection of wild populations. Similar arguments using empirical evidence  
358 can be found in Brachi et al. [2013], Gompert et al. [2014], Seppälä [2015] and Bijleveld et al. [2015].

359 Previous work has been taken to indicate that compensatory mutation is not likely to play an impor-  
360 tant role in the evolution of independently acting genes. The frequency of deleterious mutation is low; the  
361 frequency at which a new mutation compensates for the previous deleterious mutation had been expected  
362 to be even lower. However, mutations do not just happen in independently-acting genes. There is substan-  
363 tial molecular evidence for mutations in genes which exhibit complex interactions with other genes [Wilke  
364 and Adami, 2001, Wilke et al., 2003, Beerenwinkel et al., 2007, Lehner, 2011, Rokyta et al., 2011, Park and  
365 Lehner, 2013, Connelly et al., 2014]. In fact, gene regulatory networks are more likely to be able to accommo-  
366 date deleterious mutations and therefore be available for compensatory mutations. The mutations simulated  
367 in models such as those presented here refer to mutations that occur in the binding sites of proteins at an  
368 enhancer, but not mutations in protein coding sequences. As such, their regulatory effects could be buffered  
369 by epigenetic neutrality, and evolve phenotypically neutral [Wagner, 1996, Espinosa-Soto et al., 2011]. The  
370 plasticity that evolves from such a system consequently increases the opportunity for compensatory mu-  
371 tations. The frequency at which deleterious mutations compromise gene regulatory pathways is likely to  
372 be substantially higher than that for an independently acting gene because there will inevitably be more  
373 possible sites to mutate. In this paper, we have demonstrated support for this possibility, that compensatory  
374 mutation could potentially be frequent (Fig. 2) and occur to some extent regardless of patterns of selection  
375 that the networks have been through (Fig. S2A and B). We have also shown that compensatory mutation  
376 can still occur even among seriously damaged networks (Fig. S2C). This is consistent with the findings of  
377 empirical studies, such as that by Sloan et al. [2014], who found that two *Silene* species with fast-evolving  
378 plastid and mitochondrial DNA exhibited increased amino acid sequence divergence in organelle genomes  
379 but not in cytosolic ribosomes. Given that the authors found no evidence that the observed pattern was

380 driven by positive selection, they concluded that the rapid organelle genome evolution had selected for com-  
381 pensatory mutations in nuclear-encoded proteins. More recently, both Moura de Sousa et al. [2017] and  
382 Dunai et al. [2019] find that compensatory mutation rather than reversion are actually fairly outcomes for  
383 bacteria developing resistance to multiple antibiotics at once. In our present paper, we have demonstrated  
384 theoretical support and explanation for these empirical findings, by showing that compensatory mutations  
385 can be greatly increased if the population evolves during a phase of relaxed selection regime (Fig. S2). Here,  
386 ‘relaxed’ is more obviously a relative term. Organisms challenged by antibiotics are already stressed, and  
387 trade-off the costs of initial mutations with the benefits in surviving the antibiotic assault. In this climate,  
388 ‘compensatory’ mutations are mutations selected because they mitigate these additional costs, reducing the  
389 chance that the mutations leading to antibiotic resistance are swept through reversion from the population.  
390 Although antibiotic resistance is obviously a problem in human contexts, more generally this sort of dynamic  
391 illustrates a context in which ‘relaxed’ selection might come into play — when a mutation produces both  
392 costs *and* benefits, or these vary with the ecological context of the organism.

393 Many studies have shown that conventional *de novo* mutations are widely distributed throughout the  
394 genome and have a wide distribution of phenotypic effects, from complete lethality to weak benefit with  
395 respect to fitness [Sanjuán et al., 2004, Eyre-Walker and Keightley, 2007, Keightley and Eyre-Walker, 2007,  
396 Mezouk and Ross-Ibarra, 2014]. Although there have been no predictive tests of the location of compen-  
397 satory mutations, empirical studies show that compensatory mutations are often found in proteins that are  
398 in or interact with proteins that exhibit a deleterious mutation [Poon et al., 2005, Poon and Chao, 2005,  
399 Davis et al., 2009, Comas et al., 2012, Bhattacharjee et al., 2015]. Our findings concur with this. In this  
400 paper, we have showed that there is a bias with respect to where compensatory mutations happen such  
401 that compensatory mutations tend to generate regulatory circuits that closely interact with each other (solid  
402 line, Fig. 3A), whereas neutral mutations tend to accumulate more evenly distributed and therefore further  
403 apart from each other (dashed line, Fig. 3A). We also found a bias with respect to the size compensatory  
404 mutations have in terms of shifting gene regulation, such that compensatory mutations generate regulatory  
405 circuits that have larger interactive impacts (solid line, Fig. 3B), compared to neutral mutations (dashed  
406 line, Fig. 3B).

407 Previous work has indicated that the origin of mutational robustness may come from the non-adaptive  
408 results of biophysical principles or non-adaptive evolutionary forces [Ruths and Nakhleh, 2013, Payne and  
409 Wagner, 2015]. During periods of relaxed selection, regulatory networks with otherwise-lethal mutations  
410 have the potential to be compensated by additional mutations. If compensatory mutation occurs frequently  
411 enough and generates different patterns of gene regulation than networks with neutral mutations, then the  
412 processes observed here could alter which types of network are lost when selection for network stability

413 does occur. Systematic biases in the loss of particular network configurations could allow network features  
414 associated with compensatory mutation to accumulate in the population, even when the features do not  
415 at least initially confer differential reproductive success. In addition—as we have shown—the combination  
416 of recombination, deleterious mutation and compensatory mutation under moderately effective population  
417 sizes could then permit the evolution of increased regulatory complexity. In this paper, we have shown  
418 that stable networks with compensatory mutations generating a profound change in robustness compared  
419 to the impact on stable networks of neutral mutations (Fig. 3C and D). These results indicate that over  
420 time, compensatory mutations that occur during generations of relaxed selection could be biased such that  
421 regulatory circuits that closely interact and have larger interactive impacts are more likely to be maintained.  
422 We have also shown that, at least in our system, over time these can have profound impact on the complexity  
423 of the networks.

424 Taken together, we believe these findings demonstrate that the nature of compensatory mutation has  
425 been misunderstood theoretically. Periods of relaxed selection (as per our model) or indeed of increased  
426 differential selection (as per ecological challenges e.g. of antibiotics) produce a context in which natural  
427 innovations may be tolerated long enough to be combined. Combining mutations allows for a larger range of  
428 genomic innovation. Both our models and the empirical data of others show a surprising level of resilience in  
429 complex biological systems. Our models indicate that resilience may scale well with increasing complexity.  
430 Overall, the biases that emerge in this process as innovations accumulate may be an important new factor  
431 in understanding the evolution of gene regulatory networks, and evolution more broadly.

## 432 Methods

433 We employed a well-established synthetic model of gene regulatory networks to simulate compensatory  
434 mutation; see Appendix for further in-depth description of our simulations. Here we only provide a more  
435 detailed explanation of the computational model used in this paper.

436 For each individual in a finite population of size  $M$ , we consider an  $N \times N$  matrix  $W$  as a gene network  
437 that contains the regulatory interactions among  $N$  genes. Each element  $w_{i,j}$  ( $i, j = 1, 2, \dots, N$ ) represents the  
438 regulatory effect on the expression of gene  $i$  of the product of gene  $j$ . The network connectivity parameter  $c$   
439 determines the proportion of non-zero elements in the network  $W$ . A zero entry means there is no interaction  
440 between two genes. Through gene interactions, the regulatory effect acts on each gene expression pattern.  
441 This can be denoted by a state vector  $\mathbf{S}(t) = (s_1(t), s_2(t), \dots, s_i(t), \dots, s_N(t))$ , where  $s_i(t)$  represents the  
442 expression level of gene (or concentrations of proteins)  $i$  at time  $t$ . Each value of expression state  $s_i(t)$  is  
443 within the interval  $[-1, +1]$  that expresses complete repression ( $-1$ ) and complete activation ( $+1$ ). For a

444 given gene regulatory network  $W$ , the dynamics of  $\mathbf{S}$  for each gene  $i$  is modelled by a set of coupled difference  
445 equations:

$$s_i(t+1) = f\left(\sum_{j=1}^N w_{i,j} s_j(t) + \epsilon_i\right), \quad (1)$$

446 where  $f(\cdot)$  is a sigmoidal function, and  $\epsilon_i$  is a constant which reflects either a basal transcription rate of gene  
447  $i$  or influences of upstream gene(s) on gene  $i$ . For reasons of computational convenience, we set  $\epsilon_i = 0$ , and  
448 follow Siegal and Bergman [2002] and Azevedo et al. [2006] to define  $f(x) = 2/(1 + e^{-ax}) - 1$ , where  $a$  is the  
449 activation constant determining the rate of change from complete repression to complete activation.

450 In all the simulations here, we define network developmental stability as the progression from an arbitrary  
451 initial expression state,  $\mathbf{S}(0)$ , to an equilibrium expression state (reaching a fixed phenotypic pattern),  $\mathbf{S}_{\text{EQ}}$ ,  
452 by iterating Equation (1) a fixed number of times,  $devT$ . If a given network  $W$  can achieve stability over this  
453 developmental time period, it is termed ‘stable’; otherwise, it is labelled ‘unstable’. Note that this selection  
454 for network stability is also referred to as selection for network stability in which unstable networks will be  
455 eliminated. The equilibrium expression state can be reached when the following equation is met:

$$\frac{1}{\tau} \sum_{\theta=devT-\tau}^{devT} D(\mathbf{S}(\theta), \bar{\mathbf{S}}) \leq \xi, \quad (2)$$

456 where  $\xi$  is a small positive integer and set to be  $10^{-4}$  in all simulations, and  $D(\mathbf{S}, \bar{\mathbf{S}}) = \sum_{i=1}^N (s_i - s'_i)^2 / 4N$   
457 measures the difference between gene expression patterns  $\mathbf{S}$  and  $\bar{\mathbf{S}}$  which is the average of the gene expression  
458 level over the time interval  $[devT - \tau, devT - \tau + 1, \dots, devT]$ , where  $\tau$  is a time-constant characteristic for  
459 the developmental process under consideration, and depends on biochemical parameters, such as the rate  
460 of transcription or the time necessary to export mRNA into the cytoplasm for translation [Wagner, 1994].  
461 Unless otherwise specified, we used  $a = 100$ ,  $devT = 100$  and  $\tau = 10$  in all simulations, following previous  
462 studies [Wagner, 1996, Siegal and Bergman, 2002, Azevedo et al., 2006].

## 463 Initialisation

464 Each individual network in the population was generated with a gene regulatory matrix  $W$  associated  
465 with an expression state vector  $\mathbf{S}(0)$ . Specifically, the matrix was generated by randomly filling  $W$  with  
466  $c \times N^2$  non-zero elements  $w_{i,j}$  that was drawn from a standard normal distribution  $N(0, 1)$ . The associated  
467 initial expression state  $\mathbf{S}(0)$  was also set by randomly choosing each  $s_i(0) = +1$  or  $-1$ .

## 468 Mutation

469 In the mutation operation, exactly one element  $w_{i,j}$  picked at random in each regulatory matrix  $W$  would  
470 be replaced by  $w'_{i,j} \sim N(0, 1)$ . Note that the mutation only occurs among non-zero elements. In other words,  
471 the mutation process will not change the topology of the original network  $W$  in terms of forming new edges  
472 or deleting existing edges between two genes.

## 473 Recombination

474 In some simulations presented in this paper, we allowed individual networks to recombine with each  
475 other. A recombinant was produced by picking two individuals and selecting rows of the  $W$  matrices from  
476 each parent with an equal probability. This process is similar to free recombination between units formed  
477 by each gene and its *cis*-regulatory elements, but with no recombination within regulatory regions.

## 478 Strong and relaxed selection for network stability

479 In the selection for network stability regime, only individuals which were able to attain developmental  
480 stability after the mutation process were selected. In contrast, all individuals can survive regardless of they  
481 were capable or incapable of reaching equilibrium when the selection for network stability was relaxed.

## 482 Evolution

483 The evolutionary simulations were performed under the reproduction-mutation-selection life cycle. The  
484 population size  $M$  was fixed in every generation throughout the evolution in all simulations. In typical  
485 asexual evolution, an individual was chosen at random to reproduce asexually by cloning itself and was  
486 then subjected to a single mutation. Similarly, in typical sexual evolution, two individuals were chosen at  
487 random to reproduce sexually by recombining two parent networks and then subjected to a single mutation.  
488 Depending on different patterns of selection, unstable networks were excluded (under the selection for network  
489 stability regime) or allowed to stay in the population (under the relaxed selection regime). This process was  
490 repeated until  $M$  number of networks were produced.

## 491 Data Availability

492 Simulation code for the simulations is available at <https://bit.ly/2ExLhYd>.

## 493 Acknowledgements

494 Thanks to Alistair Fletcher for his early exploration of these models as part of his computer science  
495 masters degree at the University of Bath. The two final authors (JJB and NKP) are coequal.

## 496 Competing interests

497 The authors declare no financial and non-financial competing interests.

## References

- C. O. Wilke and C. Adami. Interaction between directional epistasis and average mutational effects. *Proceedings of the Royal Society of London B: Biological Sciences*, 268(1475):1469–1474, 2001.
- Claus Wilke, Richard Lenski, and Christoph Adami. Compensatory mutations cause excess of antagonistic epistasis in RNA secondary structure folding. *BMC Evolutionary Biology*, 3(1):3, 2003.
- Niko Beerenwinkel, Lior Pachter, Bernd Sturmfels, Santiago Elena, and Richard Lenski. Analysis of epistatic interactions and fitness landscapes using a new geometric approach. *BMC Evolutionary Biology*, 7(1):60, 2007.
- B. Lehner. Molecular mechanisms of epistasis within and between genes. *Trends in Genetics*, 27(8):323–331, 2011.
- D. R. Rokyta, P. Joyce, S. B. Caudle, C. Miller, C. J. Beisel, and H. A. Wichman. Epistasis between beneficial mutations and the phenotype-to-fitness map for a ssDNA virus. *PLoS Genetics*, 7(6):e1002075, 2011.
- Solip Park and Ben Lehner. Epigenetic epistatic interactions constrain the evolution of gene expression. *Molecular Systems Biology*, 9:645–645, 2013.
- S. Ciliberti, O. C. Martin, and A. Wagner. Innovation and robustness in complex regulatory gene networks. *Proceedings of the National Academy of Sciences of the United States of America*, 104(34):13591–13596, 2007.
- Anton Crombach and Paulien Hogeweg. Evolution of evolvability in gene regulatory networks. *PLoS Computational Biology*, 4(7):e1000112, 2008.

- Philip A. Romero and Frances H. Arnold. Exploring protein fitness landscapes by directed evolution. *Nature Reviews Molecular Cell Biology*, 10(12):866–876, 2009.
- Masaki E. Tsuda and Masakado Kawata. Evolution of gene regulatory networks by fluctuating selection and intrinsic constraints. *PLoS Computational Biology*, 6(8):e1000873, 2010.
- Carrie F. Olson-Manning, Maggie R. Wagner, and Thomas Mitchell-Olds. Adaptive evolution: Evaluating empirical support for theoretical predictions. *Nature Reviews Genetics*, 13(12):867–877, 2012.
- James Cotterell and James Sharpe. Mechanistic explanations for restricted evolutionary paths that emerge from gene regulatory networks. *PLoS ONE*, 8(4):e61178, 2013.
- Andreas Wagner and Jeremiah Wright. Alternative routes and mutational robustness in complex regulatory networks. *Biosystems*, 88(1-2):163–172, 2007.
- Michael Lynch, Matthew S Ackerman, Jean-Francois Gout, Hongan Long, Way Sung, W Kelley Thomas, and Patricia L Foster. Genetic drift, selection and the evolution of the mutation rate. *Nature Reviews Genetics*, 17(11):704–714, 2016.
- Adam M Siepielski, Joseph D DiBattista, and Stephanie M Carlson. It’s about time: the temporal dynamics of phenotypic selection in the wild. *Ecology Letters*, 12(11):1261–1276, November 2009a.
- Anett Dunai, Réka Spohn, Zoltán Farkas, Viktória Lázár, Ádám Györkei, Gábor Apjok, Gábor Boross, Balázs Szappanos, Gábor Grézal, Anikó Faragó, László Bodai, Balázs Papp, and Csaba Pál. Rapid decline of bacterial drug-resistance in an antibiotic-free environment through phenotypic reversion. *eLife*, 8:e47088, aug 2019. ISSN 2050-084X. doi: 10.7554/eLife.47088. URL <https://doi.org/10.7554/eLife.47088>.
- Jorge Moura de Sousa, Roberto Balbontán, Paulo DurãŁo, and Isabel Gordo. Multidrug-resistant bacteria compensate for the epistasis between resistances. *PLOS Biology*, 15(4):1–24, 04 2017. doi: 10.1371/journal.pbio.2001741. URL <https://doi.org/10.1371/journal.pbio.2001741>.
- Philippe Remigi, Catherine Masson-Boivin, and Eduardo P.C. Rocha. Experimental evolution as a tool to investigate natural processes and molecular functions. *Trends in Microbiology*, 27(7):623–634, 2019. ISSN 0966-842X. doi: <https://doi.org/10.1016/j.tim.2019.02.003>. URL <http://www.sciencedirect.com/science/article/pii/S0966842X19300411>.
- Rob J. Kulathinal, Brian R. Bettencourt, and Daniel L. Hartl. Compensated deleterious mutations in insect genomes. *Science*, 306(5701):1553–1554, 2004.

- Robert Piskol and Wolfgang Stephan. Analyzing the evolution of RNA secondary structures in vertebrate introns using Kimura's model of compensatory fitness interactions. *Molecular Biology and Evolution*, 25(11):2483–2492, 2008.
- Arthur Covert, Richard Lenski, Claus Wilke, and Charles Ofria. Experiments on the role of deleterious mutations as stepping stones in adaptive evolution. *Proceedings of the National Academy of Sciences of the United States of America*, 110(34):E3171–E3178, 2013.
- Motoo Kimura. The role of compensatory neutral mutations in molecular evolution. *Journal of Genetics*, 64(1):7–19, 1985.
- F. B. Moore, D. E. Rozen, and R. E. Lenski. Pervasive compensatory adaptation in *Escherichia coli*. *Proceedings of the Royal Society of London B: Biological Sciences*, 267(1442):515–522, 2000.
- B. R. Levin, V. Perrot, and N. Walker. Compensatory mutations, antibiotic resistance and the population genetics of adaptive evolution in bacteria. *Genetics*, 154(3):985–997, 2000.
- S. S. Choi, W. M. Li, and B. T. Lahn. Robust signals of coevolution of interacting residues in mammalian proteomes identified by phylogeny-aided structural analysis. *Nature Genetics*, 37(12):1367–1371, 2005.
- Margarita V. Meer, Alexey S. Kondrashov, Yael Artzy-Randrup, and Fyodor A. Kondrashov. Compensatory evolution in mitochondrial trnas navigates valleys of low fitness. *Nature*, 464(7286):279–282, 2010.
- S. Wright. Evolution in mendelian populations. *Genetics*, 16(2):97–159, 1931a.
- S. Wright. The genetical theory of natural selection: A review. *Journal of Heredity*, 21(8):349–356, 1931b.
- W. Stephan. The rate of compensatory evolution. *Genetics*, 144(1):419–426, 1996.
- J. Parsch, S. Tanda, and W. Stephan. Site-directed mutations reveal long-range compensatory interactions in the *Adh* gene of *Drosophila melanogaster*. *Proceedings of the National Academy of Sciences of the United States of America*, 94(3):928–933, 1997.
- M. C. Whitlock and S. P. Otto. The panda and the phage: Compensatory mutations and the persistence of small populations. *Trends in Ecology & Evolution*, 14(8):295–296, 1999.
- M. C. Whitlock, C. K. Griswold, and A. D. Peters. Compensating for the meltdown: The critical effective size of a population with deleterious and compensatory mutations. *Annales Zoologici Fennici*, 40(2):169–183, 2003.



- L. Zhang and L. T. Watson. Analysis of the fitness effect of compensatory mutations. *HFSP Journal*, 3(1): 47–54, 2009.
- Brian Charlesworth. Effective population size and patterns of molecular evolution and variation. *Nature Reviews Genetics*, 10(3):195–205, 2009.
- Sophie Maisnier-Patin, Otto G. Berg, Lars Liljas, and Dan I. Andersson. Compensatory adaptation to the deleterious effect of antibiotic resistance in salmonella typhimurium. *Molecular Microbiology*, 46(2): 355–366, 2002. ISSN 1365-2958. doi: 10.1046/j.1365-2958.2002.03173.x.
- Danna R. Gifford and R. Craig MacLean. Evolutionary reversals of antibiotic resistance in experimental populations of *Pseudomonas aeruginosa*. *Evolution*, 67(10):2973–2981, 2013. ISSN 1558-5646. doi: 10.1111/evo.12158.
- Daniel B Sloan, Deborah A Triant, Martin Wu, and Douglas R Taylor. Cytonuclear interactions and relaxed selection accelerate sequence evolution in organelle ribosomes. *Molecular Biology and Evolution*, 31(3): 673–682, March 2014.
- Ricardo B. R. Azevedo, Rolf Lohaus, Suraj Srinivasan, Kristen K. Dang, and Christina L. Burch. Sexual reproduction selects for robustness and negative epistasis in artificial gene networks. *Nature*, 440(7080): 87–90, 2006.
- A. Wagner. Does evolutionary plasticity evolve? *Evolution*, 50(3):1008–1023, 1996.
- M. L. Siegal and A. Bergman. Waddington’s canalization revisited: Developmental stability and evolution. *Proceedings of the National Academy of Sciences of the United States of America*, 99(16):10528–10532, 2002.
- R Lohaus, C L Burch, and R B R Azevedo. Genetic architecture and the evolution of sex. *The Journal of Heredity*, 101(Supplement 1):S142–S157, April 2010.
- Yifei Wang, Yinghong Lan, Daniel M. Weinreich, Nicholas K. Priest, and Joanna J. Bryson. Recombination is surprisingly constructive for artificial gene regulatory networks in the context of selection for developmental stability. In *Proceedings of the European Conference on Artificial Life 2015*, pages 530–537. The MIT Press, July 2015.
- Yifei Wang. Review of wagner’s artificial gene regulatory networks model and its applications for understanding complex biological systems. *COJ Robotics & Artificial Intelligence*, 1(1):COJRA.000501.2019, Feb 2019a.

Yifei Wang. Convergence analysis and network properties of wagner’s artificial gene regulatory network model. *Journal of Advances in Mathematics and Computer Science*, 31(2):1–18, Mar 2019b.

H. Crawford, J. G. Prado, A. Leslie, S. Hue, I. Honeyborne, S. Reddy, M. van der Stok, Z. Mncube, C. Brander, C. Rousseau, J. I. Mullins, R. Kaslow, P. Goepfert, S. Allen, E. Hunter, J. Mulenga, P. Kiepiela, B. D. Walker, and P. J. Goulder. Compensatory mutation partially restores fitness and delays reversion of escape mutation within the immunodominant HLA-B\*5703-restricted Gag epitope in chronic human immunodeficiency virus type 1 infection. *Journal of Virology*, 81(15):8346–8351, 2007.

Tiffany B. Taylor, Geraldine Mulley, Alexander H. Dills, Abdullah S. Alsohim, Liam J. McGuffin, David J. Studholme, Mark W. Silby, Michael A. Brockhurst, Louise J. Johnson, and Robert W. Jackson. Evolutionary resurrection of flagellar motility via rewiring of the nitrogen regulation system. *Science*, 347(6225):1014–1017, 2015. ISSN 0036-8075. doi: 10.1126/science.1259145.

Daniel M. Weinreich and Lin Chao. Rapid evolutionary escape by large populations from local fitness peaks is likely in nature. *Evolution*, 59(6):1175–1182, 2005. doi: 10.1111/j.0014-3820.2005.tb01769.x. URL <https://onlinelibrary.wiley.com/doi/abs/10.1111/j.0014-3820.2005.tb01769.x>.

Inaki Comas, Sonia Borrell, Andreas Roetzer, Graham Rose, Bijaya Malla, Midori Kato-Maeda, James Galagan, Stefan Niemann, and Sebastien Gagneux. Whole-genome sequencing of rifampicin-resistant mycobacterium tuberculosis strains identifies compensatory mutations in RNA polymerase genes. *Nature Genetics*, 44(1):106–110, 2012.

Gerrit Brandis, Marie Wrands, Lars Liljas, and Diarmaid Hughes. Fitness-compensatory mutations in rifampicin-resistant RNA polymerase. *Molecular Microbiology*, 85(1):142–151, July 2012.

M de Vos, B Mueller, S Borrell, P A Black, P D van Helden, R M Warren, S Gagneux, and T C Victor. Putative compensatory mutations in the rpoC gene of rifampin-resistant Mycobacterium tuberculosis are associated with ongoing transmission. *Antimicrobial Agents and Chemotherapy*, 57(2):827–832, February 2013.

Gerrit Brandis and Diarmaid Hughes. Genetic characterization of compensatory evolution in strains carrying rpoB Ser531Leu, the rifampicin resistance mutation most frequently found in clinical isolates. *Journal of Antimicrobial Chemotherapy*, 68(11):2493–2497, November 2013.

Taeksun Song, Yumi Park, Isdore Chola Shamputa, Sunghwa Seo, Sun Young Lee, Han-Seung Jeon, Hongjo Choi, Myungsun Lee, Richard J Glynne, S Whitney Barnes, John R Walker, Serge Batalov, Karina Yusim, Shihai Feng, Chang-Shung Tung, James Theiler, Laura E Via, Helena I M Boshoff, Katsuhiko S

- Murakami, Bette Korber, Clifton E III Barry, and Sang-Nae Cho. Fitness costs of rifampicin resistance in *Mycobacterium tuberculosis* are amplified under conditions of nutrient starvation and compensated by mutation in the  $\beta'$  subunit of RNA polymerase. *Molecular Microbiology*, 91(6):1106–1119, March 2014.
- Carlos Martinez, Joshua S Rest, Ah-Ram Kim, Michael Ludwig, Martin Kreitman, Kevin White, and John Reinitz. Ancestral resurrection of the *Drosophila* S2E enhancer reveals accessible evolutionary paths through compensatory change. *Molecular Biology and Evolution*, 31(4):903–916, April 2014.
- Dmitry N Ivankov, Alexei V Finkelstein, and Fyodor A Kondrashov. A structural perspective of compensatory evolution. *Current Opinion in Structural Biology*, 26:104–112, June 2014.
- Bela Szamecz, Gabor Boross, Dorottya Kalapis, Karoly Kovacs, Gergely Fekete, Zoltan Farkas, Viktoria Lazar, Monika Hrtyan, Patrick Kemmeren, Marian J A Groot Koerkamp, Edit Rutkai, Frank C P Holstege, Balazs Papp, and Csaba Pal. The genomic landscape of compensatory evolution. *PLoS Biology*, 12(8): e1001935, August 2014.
- Marie Filteau, Véronique Hamel, Marie-Christine Pouliot, Isabelle Gagnon-Arsenault, Alexandre K Dubé, and Christian R Landry. Evolutionary rescue by compensatory mutations is constrained by genomic and environmental backgrounds. *Molecular Systems Biology*, 11(10), 2015. ISSN 1744-4292. doi: 10.15252/msb.20156444.
- A San Millan, R Peña-Miller, M Toll-Riera, Z V Halbert, A R McLean, B S Cooper, and R C MacLean. Positive selection and compensatory adaptation interact to stabilize non-transmissible plasmids. *Nature Communications*, 5:5208, 2014.
- Joanne L Porter, Charles A Collyer, and David L Ollis. Compensatory stabilizing role of surface mutations during the directed evolution of dienelactone hydrolase for enhanced activity. *Protein Journal*, 34(1): 82–89, February 2015.
- Ellie Harrison, David Guymer, Andrew J Spiers, Steve Paterson, and Michael A Brockhurst. Parallel compensatory evolution stabilizes plasmids across the parasitism-mutualism continuum. *Current Biology*, 25(15):1–6, July 2015.
- Naoki Osada and Hiroshi Akashi. Mitochondrial-nuclear interactions and accelerated compensatory evolution: Evidence from the primate cytochrome C oxidase complex. *Molecular Biology and Evolution*, 29(1): 337–346, January 2012.

- Felipe S Barreto and Ronald S Burton. Evidence for compensatory evolution of ribosomal proteins in response to rapid divergence of mitochondrial rRNA. *Molecular Biology and Evolution*, 30(2):310–314, February 2013.
- S. A. West, A. D. Peters, and N. H. Barton. Testing for epistasis between deleterious mutations. *Genetics*, 149(1):435–444, 1998.
- West, Lively, and Read. A pluralist approach to sex and recombination. *Journal of Evolutionary Biology*, 12(6):1003–1012, 1999.
- Joanna J. Bryson, Yasushi Ando, and Hagen Lehmann. Agent-based models as scientific methodology: A case study analysing primate social behaviour. *Philosophical Transactions of the Royal Society of London B: Biological Sciences*, 362(1485):1685–1698, September 2007.
- Adam M. Siepielski, Joseph D. DiBattista, and Stephanie M. Carlson. It’s about time: The temporal dynamics of phenotypic selection in the wild. *Ecology Letters*, 12(11):1261–1276, 2009b. ISSN 1461-0248. doi: 10.1111/j.1461-0248.2009.01381.x.
- Benjamin Brachi, Romain Villoutreix, Nathalie Faure, Nina Hautekèete, Yves Piquot, Maxime Pauwels, Dominique Roby, Joël Cuguen, Joy Bergelson, and Fabrice Roux. Investigation of the geographical scale of adaptive phenological variation and its underlying genetics in *Arabidopsis thaliana*. *Molecular Ecology*, 22(16):4222–4240, 2013. ISSN 1365-294X. doi: 10.1111/mec.12396.
- Zachariah Gompert, Aaron A. Comeault, Timothy E. Farkas, Jeffrey L. Feder, Thomas L. Parchman, C. Alex Buerkle, and Patrik Nosil. Experimental evidence for ecological selection on genome variation in the wild. *Ecology Letters*, 17(3):369–379, 2014. ISSN 1461-0248. doi: 10.1111/ele.12238.
- O. Seppälä. Natural selection on quantitative immune defence traits: A comparison between theory and data. *Journal of Evolutionary Biology*, 28(1):1–9, 2015. ISSN 1420-9101. doi: 10.1111/jeb.12528.
- Allert I. Bijleveld, Sönke Twietmeyer, Julia Piechocki, Jan A. van Gils, and Theunis Piersma. Natural selection by pulsed predation: Survival of the thickest. *Ecology*, 96(7):1943–1956, 2015.
- Caitlin F Connelly, Jon Wakefield, and Joshua M Akey. Evolution and genetic architecture of chromatin accessibility and function in yeast. *PLoS Genetics*, 10(7):e1004427, July 2014.
- C Espinosa-Soto, O C Martin, and A Wagner. Phenotypic robustness can increase phenotypic variability after nongenetic perturbations in gene regulatory circuits. *Journal of Evolutionary Biology*, 24(6):1284–1297, June 2011.

- Rafael Sanjuán, Andrés Moya, and Santiago F. Elena. The distribution of fitness effects caused by single-nucleotide substitutions in an RNA virus. *Proceedings of the National Academy of Sciences of the United States of America*, 101(22):8396–8401, 2004.
- Adam Eyre-Walker and Peter Keightley. The distribution of fitness effects of new mutations. *Nature Reviews Genetics*, 8(8):610–618, 2007.
- Peter D. Keightley and Adam Eyre-Walker. Joint inference of the distribution of fitness effects of deleterious mutations and population demography based on nucleotide polymorphism frequencies. *Genetics*, 177(4):2251–2261, 2007.
- S. Mezouk and J. Ross-Ibarra. The pattern and distribution of deleterious mutations in maize. *G3 (Bethesda, Md.)*, 4(1):163–171, 2014.
- A. Poon, B. H. Davis, and L. Chao. The coupon collector and the suppressor mutation: Estimating the number of compensatory mutations by maximum likelihood. *Genetics*, 170(3):1323–1332, 2005.
- A. Poon and L. Chao. The rate of compensatory mutation in the DNA bacteriophage phi X174. *Genetics*, 170(3):989–999, 2005.
- Brad H. Davis, Art F. Y. Poon, and Michael C. Whitlock. Compensatory mutations are repeatable and clustered within proteins. *Proceedings of the Royal Society of London B: Biological Sciences*, 276(1663):1823–1827, 2009.
- Amrita Bhattacharjee, Saurav Mallik, and Sudip Kundu. Compensatory mutations occur within the electrostatic interaction range of deleterious mutations in protein structure. *Journal of Molecular Evolution*, 80(1):10–12, January 2015.
- Troy Ruths and Luay Nakhleh. Neutral forces acting on intragenomic variability shape the Escherichia coli regulatory network topology. *Proceedings of the National Academy of Sciences of the United States of America*, 110(19):7754–7759, 2013.
- Joshua L. Payne and Andreas Wagner. Mechanisms of mutational robustness in transcriptional regulation. *Frontiers in Genetics*, 6(322), 2015.
- Andreas Wagner. Evolution of gene networks by gene duplications: A mathematical model and its implications on genome organization. *Proceedings of the National Academy of Sciences of the United States of America*, 91(10):4387–4391, 1994.

## Supplementary Figures

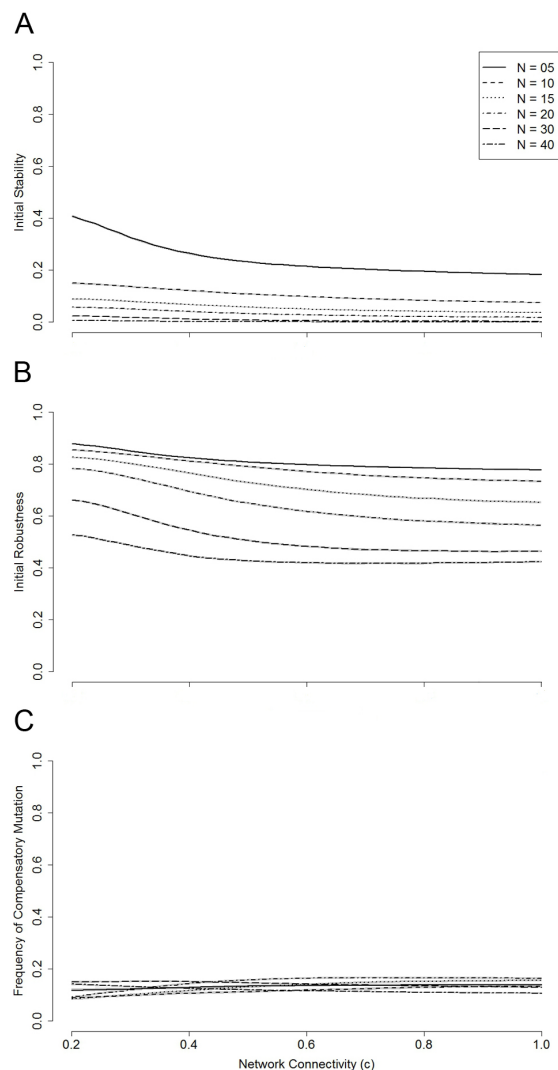

Figure S1: **The influence of the size and connectivity of a gene regulatory network on its initial stability, robustness and frequency of compensatory mutation.** For each network size ( $N = 5, 10, 15, 20, 30$  and  $40$ ) with each connectivity given from a range of values in continuous intervals ( $[0.2, 1]$ , step size  $0.02$ ), we tested the proportion of gene networks that are stable based on an initial  $10,000$  randomly generated networks (**A**), the robustness of stable networks after exposure to a single round of mutation based on an initial  $10,000$  randomly generated stable networks (**B**), and the frequency of compensatory mutation based on an initial  $10,000$  randomly generated stable networks (**C**) (rescaled from Fig. 2). The shaded areas represent 95% confidence intervals based on 100 independent runs.

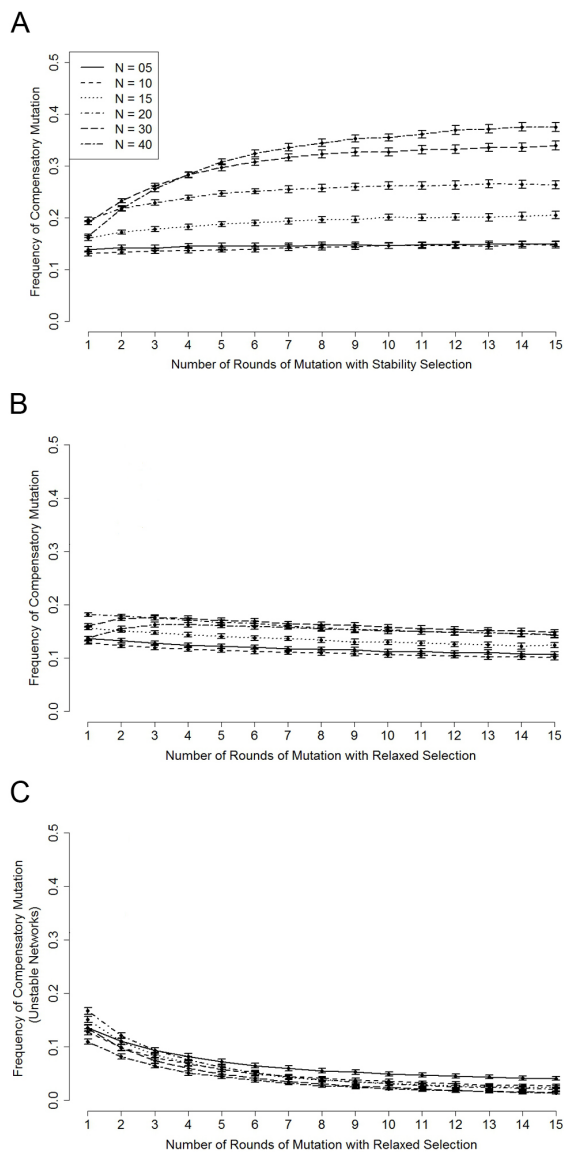

Figure S2: **Compensatory mutations can occur in networks regardless of different patterns of selection.** For each network size ( $N = 5, 10, 15, 20, 30$  and  $40$ ) with network connectivity  $c = 0.76$ , we collected 10,000 only stable, both stable and unstable, and only unstable networks with one to fifteen rounds of mutation. For each round of mutation, each network was subjected to one single mutation (for unstable networks) or two single mutations (for stable networks). Then, we measured the frequency of compensatory mutation in networks that have been subjected to bouts of selection for network stability (**A**), networks that have been subjected to bouts of relaxed selection (**B**), and networks with cumulative deleterious mutations (**C**). The error bars represent 95% confidence intervals based on 100 independent runs.

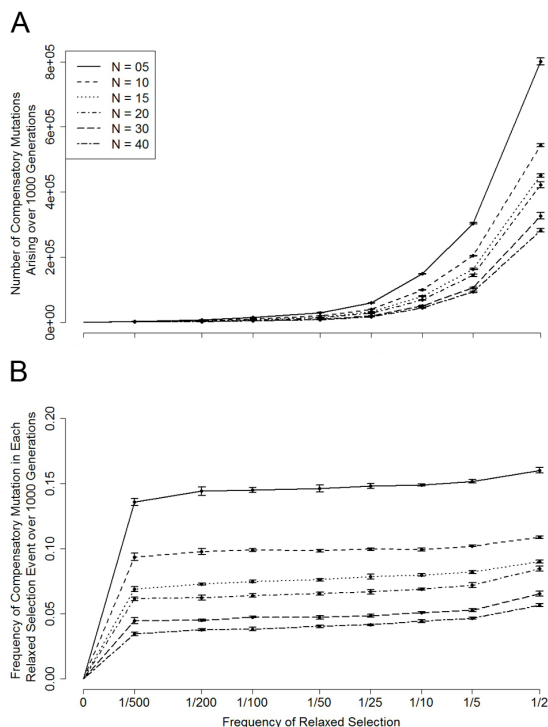

Figure S3: **Relaxed selection stimulates compensation in gene regulatory networks.** For each network size ( $N = 5, 15, 10, 20, 30$  and  $40$ ) with connectivity  $c = 0.76$ , we measured the number of compensatory mutations occurring after the previous relaxed selection, which happened in every 2, 5, 10, 25, 50, 100, 200 and 500 generations. The reported results are the total number of compensatory mutations (of 10,000 networks) (**A**) and frequency of compensatory mutation (per network per relaxed selection cycle) occurring over a total of 1,000 generations for populations with different sizes (**B**). Error bars or shaded areas represent 95% confidence intervals based on 100 independent runs.



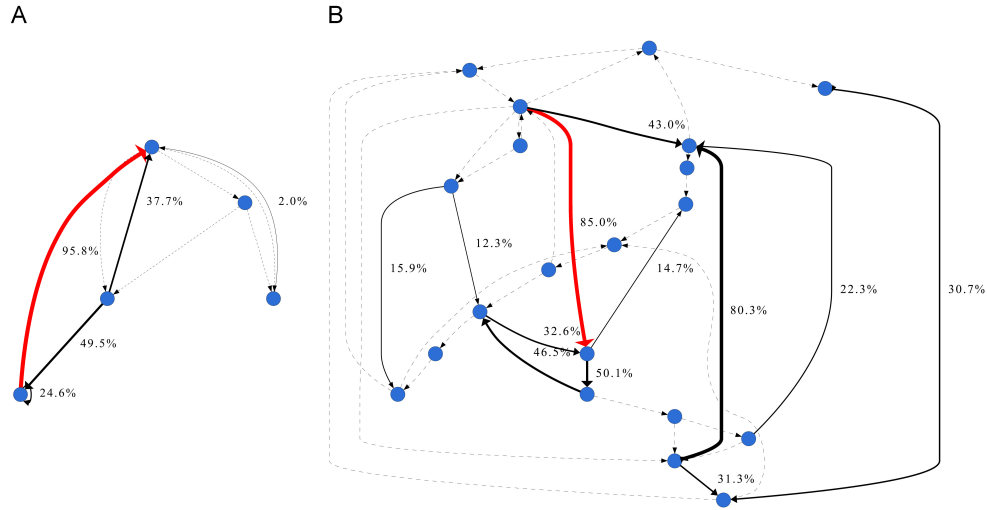

Figure S4: **Examples of the spatial probability of compensatory mutation occurring on gene networks.** In both examples,  $N = 5$  (**A**) and  $20$  (**B**), for a particular compromised network that was stable initially, we executed one additional mutation round 1,000 times on each edge. Then, the percentage of each mutation on that edge that restored GRN stability after mutation was measured. Unmarked edges had a CM 0% of the time. Note the solid line with width also indicates the probability an edge's mutation was compensatory, and the dashed line to represent the edges for which mutation never compensated this particular deleterious mutation. The original deleterious mutation occurred on the edge marked in red. Note: The directed edge represents the interaction between two connected genes. But we do not distinguish negative or positive regulation in the provided examples.

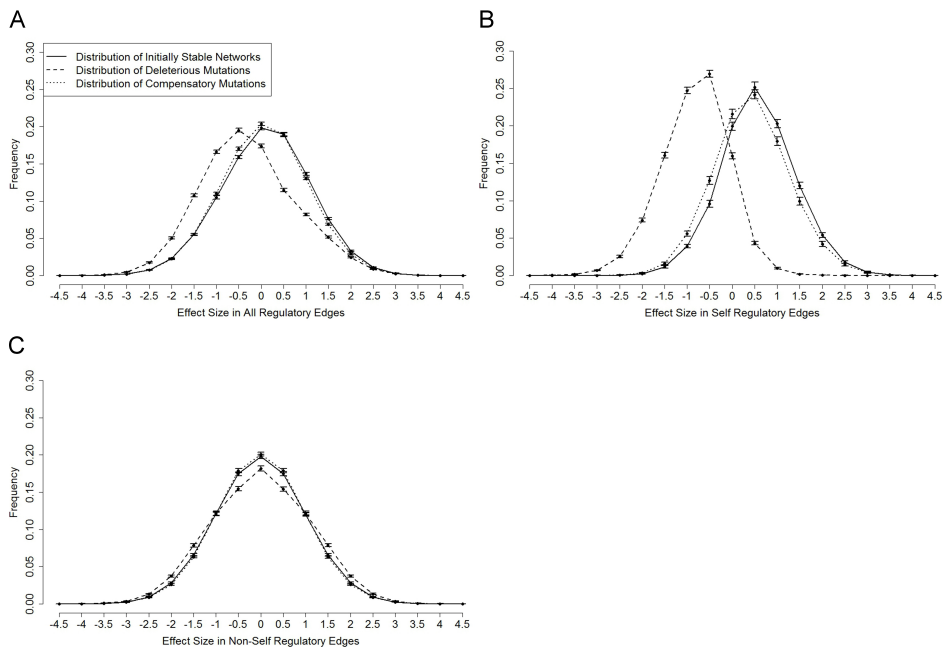

**Figure S5: The distribution of regulation in initially-stable, compromised and restored networks.** For randomly generated stable networks with  $N = 5$  and  $c = 0.4$ , we collected 10,000 sample regulations. We also collected 10,000 sample regulation weights from deleterious mutations that compromised initially-stable networks as well as from compensatory mutations that restored the stability of previously-broken networks. We then measured the distributions in all regulatory edges (**A**), in self-regulatory edges (**B**) and ignoring self-regulatory edges (**C**). Given that the regulations are continuous values, we grouped them into 19 bins from  $[-4.5, +4.5]$  (step size 0.5). The error bars represent 95% confidence intervals based on 100 independent runs.

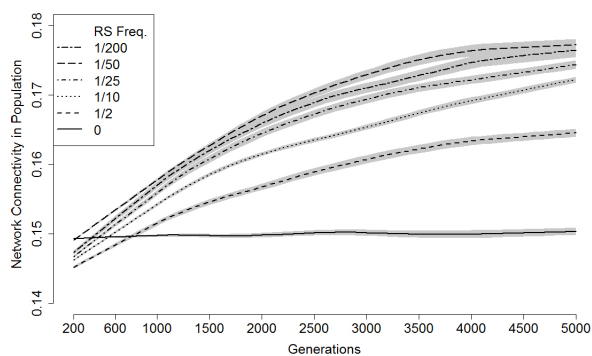

Figure S6: **Compensatory mutation generates regulatory complexity in stable networks without an initial variation in connectivity.** For the network size  $N = 40$  and the connectivity  $c = 0.15$ , we collected 10,000 stable networks, then evolved them for 5000 generations, allowing recombination at each generation. In every 200 generations, we measured the network connectivity of the population (stable) in which the relaxed selection occurs in every 2, 10, 25 50 and 200 generations. We also measured the network connectivity of the population when there was no relaxed selection as a control group. Shaded areas represent 95% confidence intervals based on 10 independent runs.

## Supplementary Text

### Estimating the relative frequency of compensatory mutation

To gain an impression of the properties of the initial gene regulatory networks, we first tested the probability of network stability in randomly-generated networks. As illustrated in Fig. S1A, smaller networks are more likely to be stable. Moreover, the relative frequency of stability in networks with low levels of connectivity is higher than that of networks with high levels of connectivity. This is in general accordance with previous work, typically done at connectivity  $c = 0.75$ , e.g. Azevedo et al. [2006], which indicates that larger networks with complex topology tend to be unstable.

In the second experiment, we explored the robustness of initially-stable networks; that is, we investigated the probability that stable networks remain stable after a single round of mutation. Here, a single mutation means exactly one non-zero entry in an individual's genotype would be mutated. Given that the initially-stable networks were collected from the original randomly-generated ones, it would seem reasonable to predict that the small stable networks are more likely to break after one mutation round, since they contain fewer pathways and a single mutation, therefore, has a greater proportional effect. However, the results in Fig. S1B show the opposite effect: the stability of the small networks is still high. The mutation operation is effectively an alternative way of generating new networks; thus, the mutated networks have the same properties as the initial ones.

In our third experiment, we measured the compensatory mutation frequency in previously-stable networks. Specifically, we started from a population pool where each stable network was randomly generated. Then, we exposed these initially-stable networks to a single round of mutation. We focused on those unstable networks where each network contained a single deleterious mutation. Next, we exposed these compromised networks to an additional round of mutation. Finally, we tested the stability of the resulting networks. The stable networks at this point had experienced compensatory mutation. We then measured the frequency of individuals that experienced compensatory mutation. As shown in Fig. S1C (also see Fig. 2, main text), the frequency of compensatory mutation is largely scale invariant both to the network size and the network connectivity.

### Exploring strong and relaxed selection for network stability on compensatory mutation frequency

In this set of experiments, we investigated the frequency of compensatory mutation after many generations of both strong and relaxed selection for network stability to test whether compensatory mutation continues

to occur even after lengthy evolution (see Fig. S2A and Fig. S2B). Specifically, under the selection for network stability regime, we collected 10,000 stable networks at each generation where each network in the population was subjected to one single mutation. Then, we performed another round of mutation, focusing on the unstable networks that resulted from the previous round, and measured the probability of a second mutation that can restore the network stability of those compromised networks. Similarly, under the relaxed selection regime, we collected 10,000 networks at each generation where each network in the population was subjected to one single mutation. However, for each relaxed selection generation, there were both stable and unstable networks after the population was subjected to the single mutation, since we did not perform selection restricting networks to being stable. The overall frequency of compensatory mutation for the population during each relaxed selection generation was averaged over the results of stable networks and unstable networks that were calculated separately.

In addition, we also measured the frequency of compensatory mutation among unstable networks during each relaxed selection event to further confirm that compensatory mutation can occur even in seriously damaged networks (see Fig. S2C). Specifically, we collected 10,000 unstable networks at each generation where each network in the population was subjected to one single mutation, so really in this case we had selected against network stability. Then, we performed another round of mutations and measured the probability of a second mutation that could restore network stability. Note that this set of experiments is similar to those experiments described above, but here we only focus on unstable networks, whereas we consider both stable and unstable networks in the relaxed selection regime.

## **Exploring the frequency of relaxed selection in simulating compensatory mutations**

In this set of experiments, we tested whether frequent relaxed selection can generate more compensatory mutations (see Fig. S3A). Specifically, we collected a population pool of 10,000 stable networks that were generated randomly. The initial population was then evolved under a relaxed selection regime with a frequency of  $1/2$ ,  $1/5$ ,  $1/10$ ,  $1/25$ ,  $1/100$ ,  $1/200$  and  $1/500$  for a total of 1,000 generations. Note that during relaxed selection event, both stable and unstable networks can survive when the population is subjected to one single round of mutation. The number of compensatory mutations was recorded immediately after each relaxed selection event when the population was subjected to another single round of mutation. The reported results are the total number of compensatory mutations (see Fig. S3A) and frequency of compensatory mutation (per network per relaxed selection event, see Fig. S3B) arising over 1,000 generations.

## Exploring population diversity for highly stable networks

In this set of experiments, we investigated how the population diversity is impacted in networks that have been exposed to many generations of strong selection for network stability (see Fig. S7). Specifically, we tested whether the increased compensatory mutation frequency shown in Fig. S2A was due to the property of particular networks that had been selected for, or whether it was the property of a diverse population. Following the measurement used in Azevedo et al. [2006], the genetic diversity is defined as:

$$H = 1 - \sum_{i=1}^n p_i^2, \quad (3)$$

where  $n$  is the total number of alleles, i.e., the unique values contained in the same site crossing all individual networks, and  $p_i$  is the frequency of allele  $i$ . The genetic variation in a population is calculated as the mean gene diversity over non-zero sites of the interaction matrix for a given genotype  $W$ .

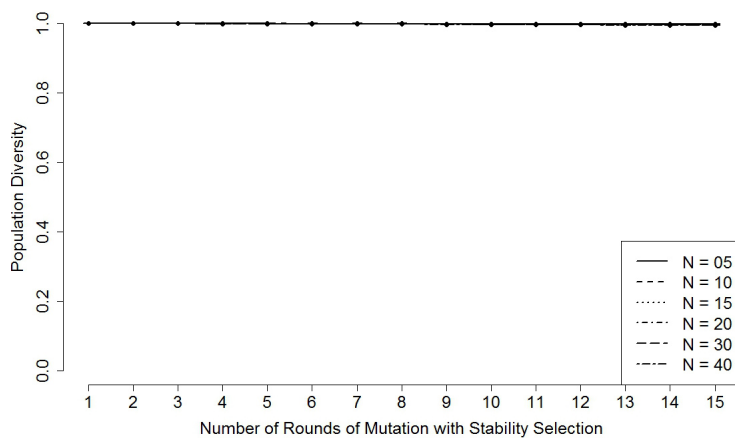

Figure S7: Population diversity of highly stable networks. For each network size ( $N = 5, 10, 15, 20, 30$  and  $40$ ) with network connectivity  $c = 0.76$ , we tested population diversity for 10,000 networks that had been exposed to selection for network stability following up to fifteen rounds of mutation as described in Fig. S2A. The error bars represent 95% confidence intervals based on 100 independent runs.

From Fig. S7, we can see that networks that have been through many generations of selection for network stability can still maintain a high network diversity.

## Location of compensatory mutations

In this set of experiments, we first sought to visualise locations at which the compensatory mutations are more likely to occur (see Fig. S4). To this end, in a set of compromised networks (those stable networks that proved fragile to a single round of mutation), we marked the site of the deleterious mutation, then measured the relative frequency of compensatory mutation that occurred at each possible site, including the site of the deleterious mutation, within this compromised network. For each possible site, we measured the outcomes over 1,000 simulated mutations on that site (so that only the extent of regulation was mutated randomly, not the location).

To quantify the distance between deleterious and (potentially) compensatory mutation, we first define ‘distance’ as used in this paper. Suppose a given gene regulatory network, denoted as  $W$ , has two marked edges denoted as  $\overrightarrow{AB}$  (deleterious mutation) and  $\overrightarrow{CD}$  (compensatory mutation), where  $A$ ,  $B$ ,  $C$  and  $D$  represent different genes in  $W$  and  $\rightarrow$  marks the edge direction. The distance between  $\overrightarrow{AB}$  and  $\overrightarrow{CD}$  can be calculated as

$$DIS(\overrightarrow{AB}, \overrightarrow{CD}) = \begin{cases} 0 & \text{if } A = C \text{ and } B = D \\ 1 & \text{if } A = D \text{ and } B = C \\ dis(A, C) + 1 & \text{if } B \text{ and } D \notin path(A, C) \\ dis(A, C) & \text{if } B \text{ or } D \in path(A, C) \\ dis(A, C) - 1 & \text{if } B \text{ and } D \in path(A, C) \end{cases} \quad (4)$$

where  $dis(A, C)$  is the fewest edges possible from  $A$  to  $C$  and  $path(A, C)$  includes the vertices on the shortest path between  $A$  and  $C$  in network  $W$ .

An example process of compensatory mutation in a gene regulatory network can be seen in Fig. S8. This stable network can be compromised by a single deleterious mutation (marked in red) and compensated by an additional mutation (marked in blue). According to Equation (4), the distance from deleterious mutation site  $\overrightarrow{CA}$  to compensatory mutation site  $\overrightarrow{CE}$  can be calculated as:  $DIS(\overrightarrow{CA}, \overrightarrow{CE}) = 1$ .

Next, we compared the relative frequencies of compensatory mutation among gene networks whose marked edges (caused by additional mutation) were 0, 1, 2, 3, and 4 steps away from the deleterious mutation (see Fig. 3, main text, and also see Fig. S9). We also performed similar experiments for medium ( $N = 20$ ) and large networks ( $N = 40$ ), as shown in Fig. S10 and Fig. S11.

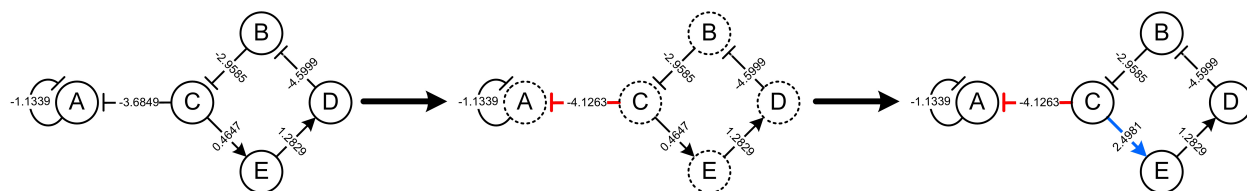

Figure S8: An example process of compensatory mutation in a gene regulatory network. The initially stable gene network contains five genes:  $A$ ,  $B$ ,  $C$ ,  $D$  and  $E$ . In the initial network (on the left side), each directional edge represents the strength (weight) of interaction between the linked two genes. The initial gene expression pattern is  $\mathbf{s}(0) = (-1, -1, +1, +1, +1)$ . In the compromised network (in the middle), a mutation occurs on  $\overline{CA}$  (indicated in red), which leads to the failure of stabilising the gene expression patterns (marked by dashed circles). In the compensated network (on the right side), the compromised network is fixed by an additional mutation that occurs on  $\overline{CE}$  (indicated in blue), reaching an equilibrium expression  $\mathbf{s}_{EQ} = (-1, -1, +1, +1, +1)$ .

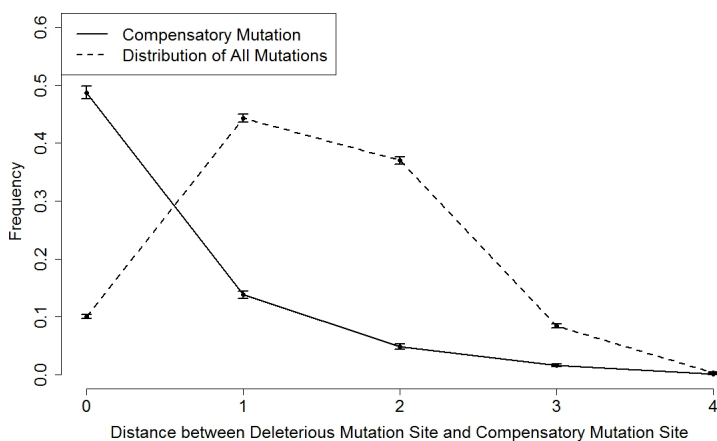

Figure S9: The compensatory mutation location and distance distribution of all mutations relative to the original deleterious mutation sites (Small Networks). For initially stable networks with size  $N = 5$  and connectivity  $c = 0.4$ , we first collected a pool of compromised networks with deleterious mutations after a single mutation round. We then forced second mutations, classifying these as being 0 (on the same site), 1, 2, 3 and 4 steps away from the original deleterious mutations. For each of these mutation-site-distance categories, we measured the probability that the mutation was compensatory (that it returned the network to stability), based on 10,000 sample networks collected for each distance category as shown in the solid line. We also recorded the spatial distribution of second mutations (10,000 sample networks) occurring randomly in those compromised networks with respect to their original deleterious mutation sites, shown in the dashed line. The error bars represent 95% confidence intervals based on 100 independent runs.



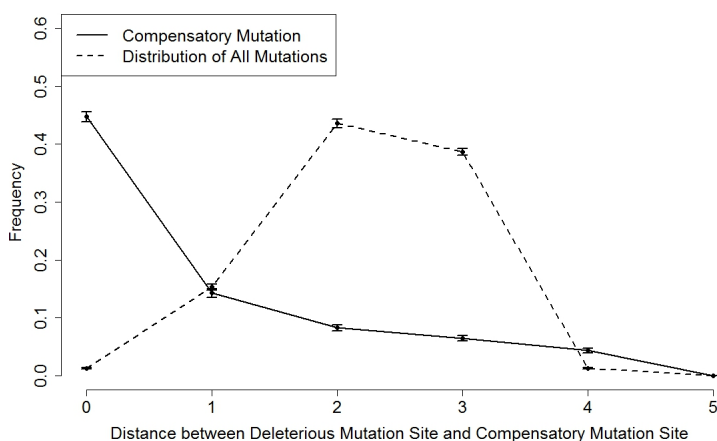

Figure S10: The compensatory mutation location and distance distribution of all mutations relative to the original deleterious mutation sites (Medium Networks). For initially stable networks with size  $N = 20$  and connectivity  $c = 0.2$ , we first collected a pool of compromised networks with deleterious mutations after a single mutation round. We then forced second mutations, classifying these as being 0 (on the same site), 1, 2, 3, 4 and 5 steps away from the original deleterious mutations. For each of these mutation-site-distance categories, we measured the probability that the mutation was compensatory (that it returned the network to stability), based on 10,000 sample networks collected for each distance category as shown in the solid line. We also recorded the spatial distribution of second mutations (10,000 sample networks) occurring randomly in those compromised networks with respect to their original deleterious mutation sites, shown in the dashed line. The error bars represent 95% confidence intervals based on 100 independent runs.

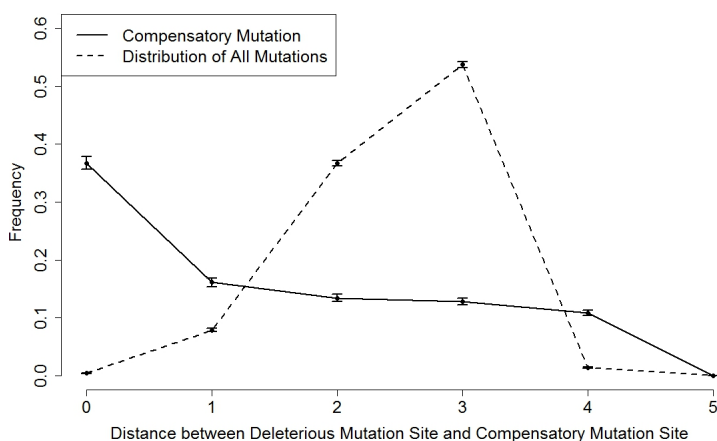

Figure S11: The compensatory mutation location and distance distribution of all mutations relative to the original deleterious mutation sites (Large Networks). For initially stable networks with size  $N = 40$  and connectivity  $c = 0.15$ , we first collected a pool of compromised networks with deleterious mutations after a single mutation round. We then forced second mutations, classifying these as being 0 (on the same site), 1, 2, 3, 4 and 5 steps away from the original deleterious mutations. For each of these mutation-site-distance categories, we measured the probability that the mutation was compensatory (that it returned the network to stability), based on 10,000 sample networks collected for each distance category as shown in the solid line. We also recorded the spatial distribution of second mutations (10,000 sample networks) occurring randomly in those compromised networks with respect to their original deleterious mutation sites, shown in the dashed line. The error bars represent 95% confidence intervals based on 100 independent runs.

## Exploring the size of gene regulation on compensatory mutation frequency

In this set of experiments, we investigated effective changes in gene regulation associated with these mutations (see Fig. 3, main text, and also see Fig. S12). Specifically, we conducted experiments to measure the frequency of compensatory mutation when the second mutation had an additional weight added to it. We studied a range of weight changes from ( $w = [-5, 5]$ ) with a step size of 0.05. For each step size, we first performed one mutation round as usual on the initial population of stable networks, creating a sub-population of 10,000 compromised networks. Then, for these mutated networks we performed a second mutation round; however, this time instead of replacing one entry in the interaction matrix with  $N(0, 1)$ , we added a fixed value  $w$  drawn from  $[-5, 5]$  to the original value of the randomly picked site. Then, we measured the frequency of second mutations restoring the network stability. We also performed similar experiments for medium ( $N = 20$ ) and large networks ( $N = 40$ ), as shown in Fig. S13 and Fig. S14.

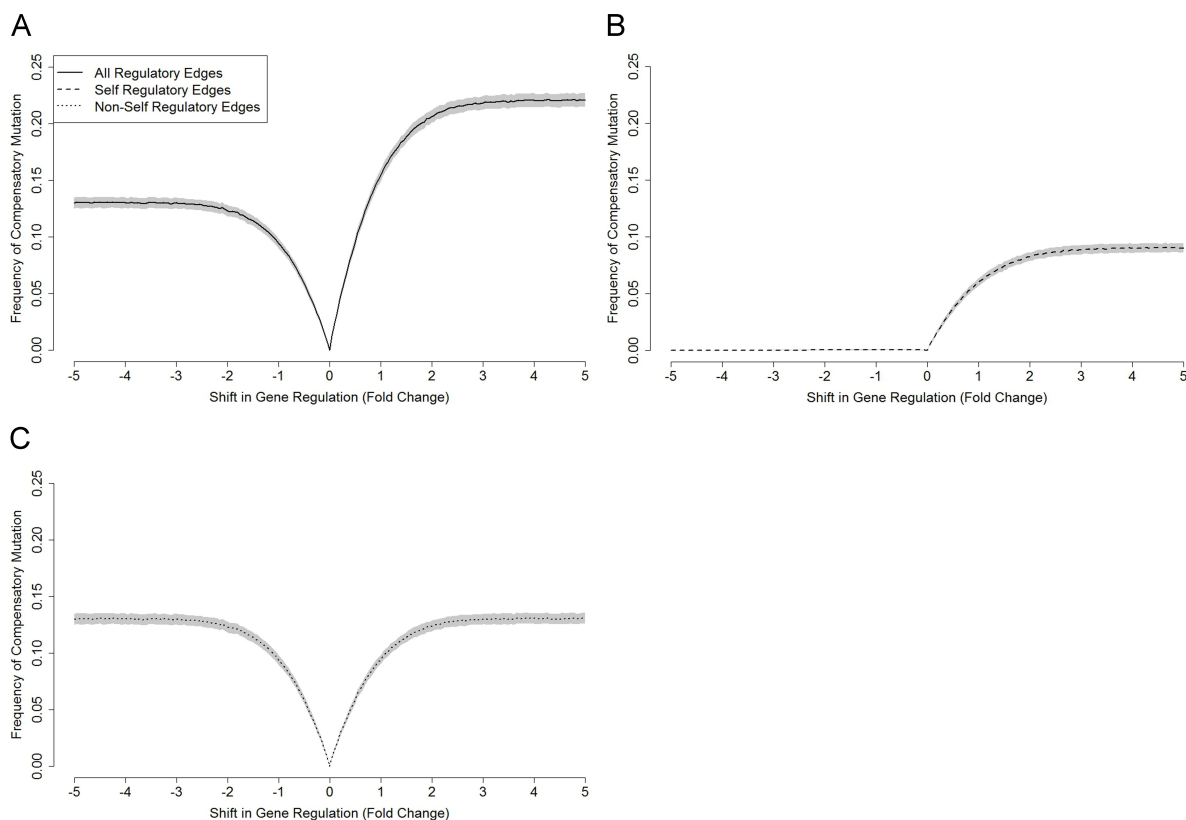

Figure S12: The influence of different intensities of gene regulations on the frequency of compensatory mutation (Small Networks). We first collected 10,000 sample networks that had been made unstable by a single mutation from a pool of initially stable networks with  $N = 5$  and  $c = 0.4$ . Then, we experimented with how a new mutation of varying intensities of gene regulation altered the chances of restoring gene stability. Specifically, we performed new mutations to those compromised networks with deleterious mutations by adding a weight from  $[-5, +5]$  (step size 0.5) to the original regulatory impact, then assessed the resulting patterns in all regulatory edges (**A**), in self-regulatory edges (**B**) and ignoring self-regulatory edges (**C**). The shaded areas represent 95% confidence intervals based on 100 independent runs.

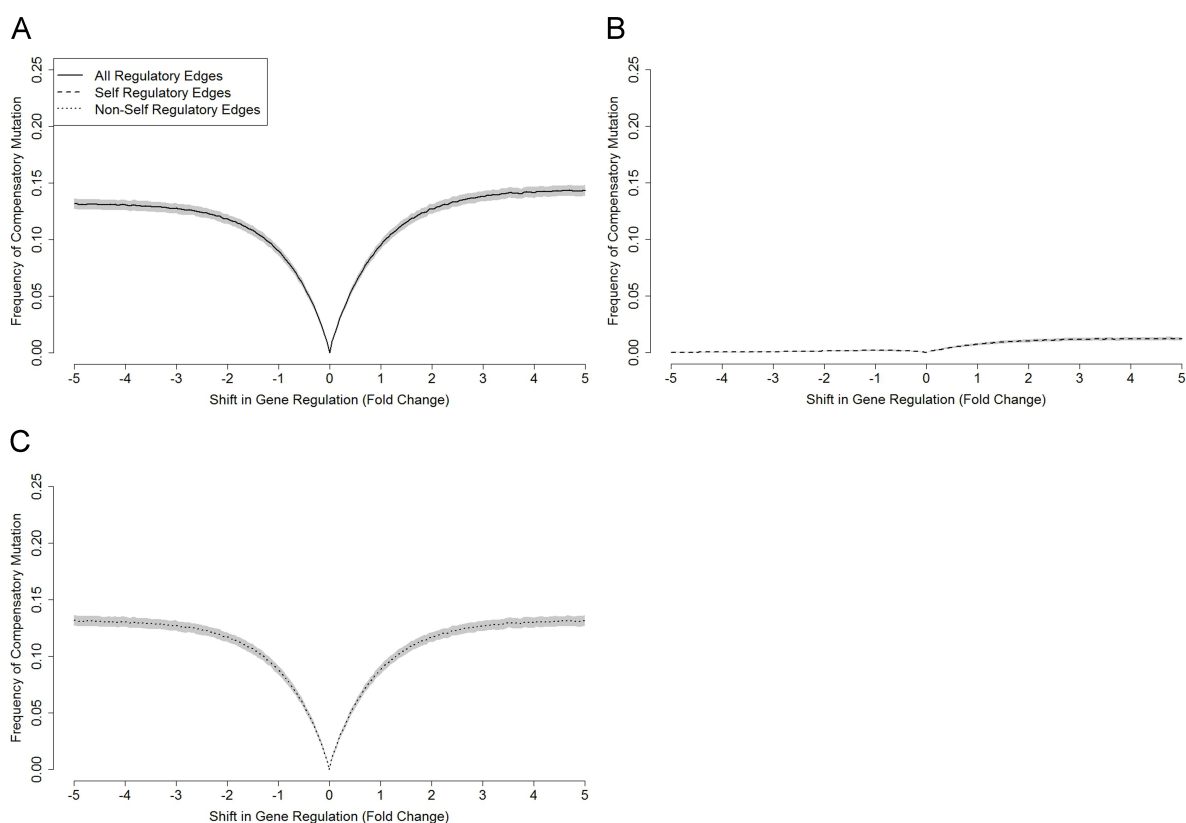

Figure S13: The influence of different intensities of gene regulation on frequency of compensatory mutation (Medium Networks). We first collected 10,000 sample networks that had been made unstable by a single mutation from a pool of initially stable networks with  $N = 20$  and  $c = 0.2$ . Then, we experimented with how a new mutation of varying intensities of gene regulation altered the chances of restoring gene stability. Specifically, we performed new mutations to those compromised networks with deleterious mutations by adding a weight from  $[-5, +5]$  (step size 0.5) to the original regulatory impact, then assessed the resulting patterns in all regulatory edges (**A**), in self-regulatory edges (**B**) and ignoring self-regulatory edges (**C**). The shaded areas represent 95% confidence intervals based on 100 independent runs.

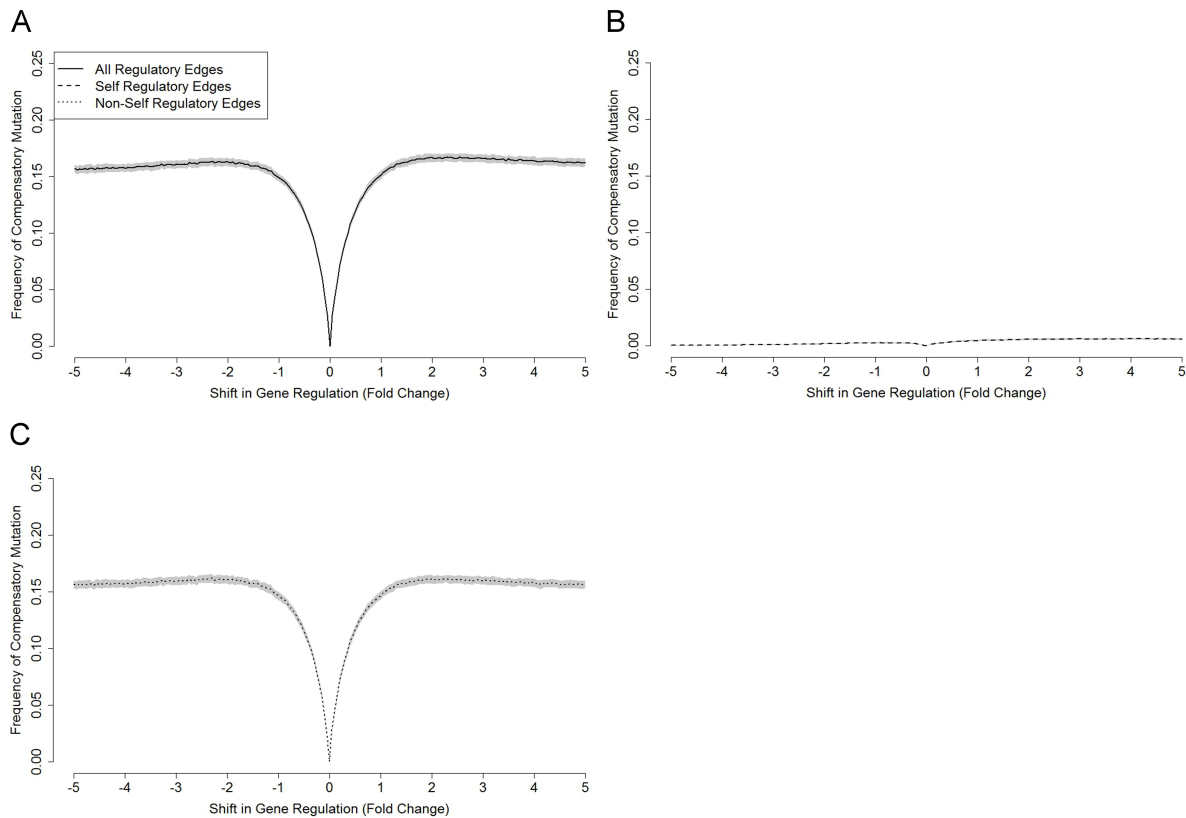

Figure S14: The influence of different intensities of gene regulation on frequency of compensatory mutation (Large Networks). We first collected 10,000 sample networks that had been made unstable by a single mutation from a pool of initially stable networks with  $N = 40$  and  $c = 0.15$ . Then, we experimented with how a new mutation of varying intensities of gene regulation altered the chances of restoring gene stability. Specifically, we performed new mutations to those compromised networks with deleterious mutations by adding a weight from  $[-5, +5]$  (step size 0.5) to the original regulatory impact, then assessed the resulting patterns in all regulatory edges (**A**), in self-regulatory edges (**B**) and ignoring self-regulatory edges (**C**). The shaded areas represent 95% confidence intervals based on 100 independent runs.

## Exploring the distribution of regulation in initially-stable, compromised and restored networks

In this set of experiments, we investigated the distribution of regulation in initially stable, compromised and restored networks (see Fig. S5). Specifically, we collected 10,000 sample regulatory values each from edges of randomly generated stable networks, edges where deleterious mutations occurred (compromising network stability), and edges where compensatory mutations occurred (restoring previously compromised networks). We then measured their corresponding distributions, discriminating between self- and non-self-regulatory edges. We also performed similar experiments for medium ( $N = 20$ ) and large networks ( $N = 40$ ), as shown in Fig. S15 and Fig. S16.

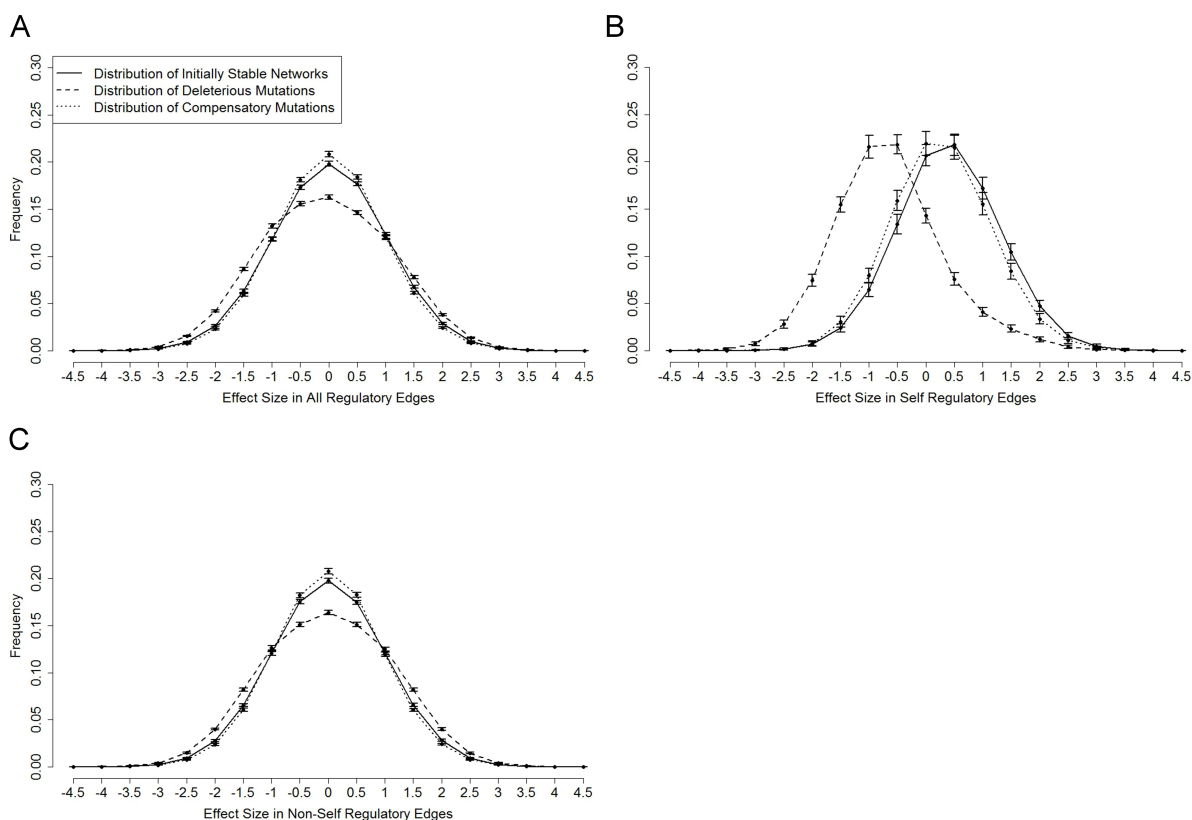

Figure S15: The distribution of regulation in initially stable, compromised and restored networks (Medium Networks). For randomly generated stable networks with  $N = 20$  and  $c = 0.2$ , we collected 10,000 sample regulations. We also collected 10,000 sample regulation weights from deleterious mutations that compromised initially stable networks as well as from compensatory mutations that restored the stability of previously broken networks. We then measured the distributions in all regulatory edges (**A**), in self-regulatory edges (**B**) and ignoring self-regulatory edges (**C**). Given that the regulations are continuous values, we grouped them into 19 bins from  $[-4.5, +4.5]$  (step size 0.5). The error bars represent 95% confidence intervals based on 100 independent runs.

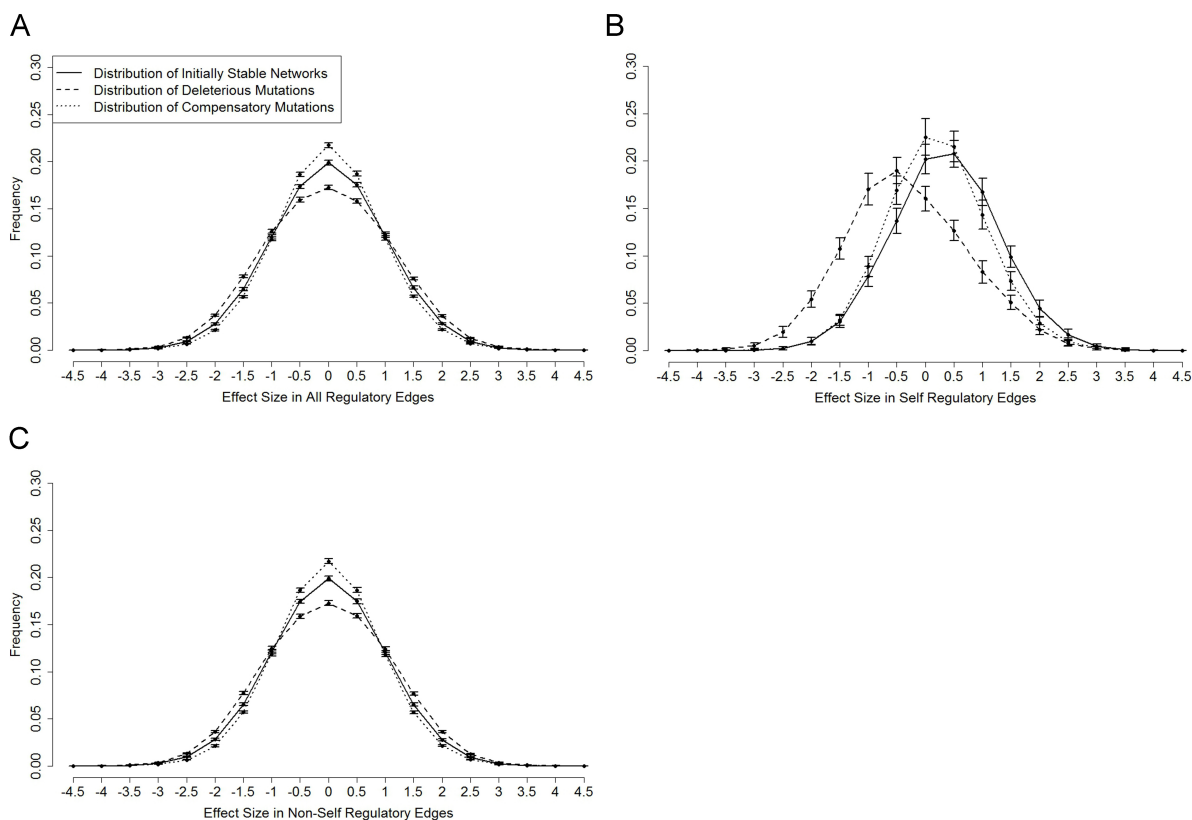

Figure S16: The distribution of regulation in initially stable, compromised and restored networks (Large Networks). For randomly generated stable networks with  $N = 40$  and  $c = 0.15$ , we collected 10,000 sample regulations. We also collected 10,000 sample regulation weights from deleterious mutations that compromised initially stable networks as well as from compensatory mutations that restored the stability of previously broken networks. We then measured the distributions in all regulatory edges (A), in self-regulatory edges (B) and ignoring self-regulatory edges (C). Given that the regulations are continuous values, we grouped them into 19 bins from  $[-4.5, +4.5]$  (step size 0.5). The error bars represent 95% confidence intervals based on 100 independent runs.



## Exploring properties of location and size effects in neutral mutations

In this set of experiments, we investigated properties of location and size effects in neutral mutations which served as control groups for solid lines in Fig. 3A and B, main text. Specifically, to test the location effect, we collected a population pool of stable networks that had been subjected to one round of mutation (neutral). Then, we measured the probability of stable networks after performing a second mutation that was 0, 1, 2, 3, and 4 steps away from the previous neutral mutation site based on 10,000 sample networks for each distance category (see dashed line in Fig. 3A). Similarly, to test the mutation size effect, we collected a population pool of stable networks that had been subjected to one round of mutation (neutral). Then, we measured the probability of stable networks after performing a second mutation that had a particular shift in gene regulation from  $[-5, +5]$  based on 10,000 sample networks for each shifted-weight category (see dashed line in Fig. 3B). In both tests for location and size effects, we also performed similar experiments for medium ( $N = 20$ ) and large networks ( $N = 40$ ), as shown in Fig. S17 and Fig. S18.

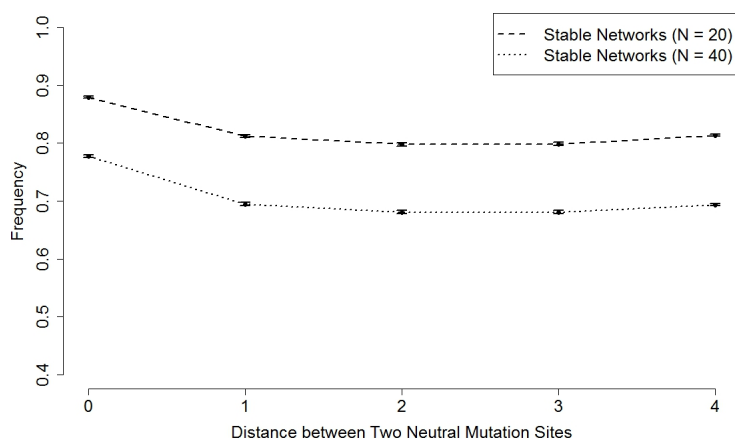

Figure S17: **Location effect in networks with neutral mutations (Medium and Large Networks).** For medium networks ( $N = 20, c = 0.2$ ) and large networks ( $N = 40, c = 0.15$ ), we first collected a pool of stable networks with neutral mutations after a single mutation round. We then forced second mutations, classifying these as being 0 (on the same site), 1, 2, 3 and 4 steps away from the previous neutral mutations. For each of these mutation-site-distance categories, we measured the probability that the mutation was neutral (did not impair network stability) based on 10,000 sample networks collected for each distance category. The error bars represent 95% confidence intervals based on 100 independent runs.

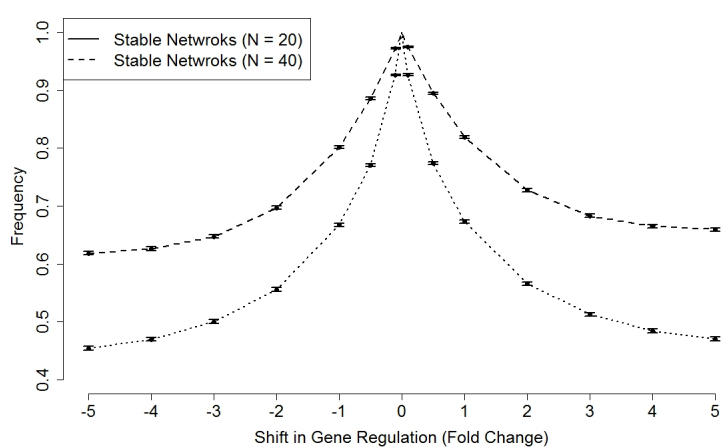

Figure S18: **Mutation size effect in networks with neutral mutations (Medium and Large Networks)**. We first collected 10,000 stable networks with neutral mutations after a single mutation round from a pool of initially stable medium networks ( $N = 20, c = 0.2$ ) and large networks ( $N = 40, c = 0.15$ ). Then, we experimented with how new mutations of varying intensities of gene regulation altered the chance of retaining network stability. Specifically, we performed new mutations to those networks with neutral mutations by adding a weight from  $[-5, +5]$  (step size 1 and with four additional regulation shifts:  $-0.5, -0.1, 0.1$  and  $0.5$ ) to the original regulatory impact, then assessed the resulting patterns. The error bars represent 95% confidence intervals based on 100 independent runs.

## Exploring the impact of distance and size effects on network robustness

In this set of experiments, we explored the effects of location and mutation size on robustness in networks with one deleterious mutation and one compensatory mutation and in networks with two consecutive neutral mutations to investigate whether networks with compensatory mutations have a different evolutionary consequence compare with networks with neutral mutations (see Fig. 3C and D and also see Fig. S19 and Fig. S22).

Specifically, to test the distance effect, we collected 10,000 sample networks at each distance (between deleterious mutation and compensatory mutation). Then, for each category of distance, we measured the proportion of stable networks after one additional round of single mutation. The reported results are both actual robustness (see the solid line in Fig. S19A) and percentage change in robustness (see the solid line in Fig. S19B). Similarly, for the control group, instead of collecting networks that were subjected to one deleterious mutation and one subsequent compensatory mutation, we collected 10,000 sample networks that were subjected to two consecutive neutral mutations at each distance (between two neutral mutations), and then assessed the actual robustness (see the dashed line in Fig. S19A) as well as the percentage of robustness change (see the dashed line in Fig. S19B). We also performed similar experiments for medium ( $N = 20$ ) and large networks ( $N = 40$ ), as shown in Fig. S20 and Fig. S21.

Likewise, to test size effect, we collected 10,000 sample networks that were compensated by mutations with different shifts in gene regulation. Then, for each category of mutation size, we measured the proportion of stable networks after one additional round of single mutation. The reported results are both actual robustness (see the solid line in Fig. S22A) and percentage change in robustness (see the solid line in Fig. S22B). Similarly, for the control group, instead of collecting networks that were subjected to one normal deleterious mutation and one subsequent compensatory mutation with different shifts in gene regulation, we collected 10,000 sample networks that were subjected to two consecutive neutral mutations, one normal neutral mutation and the other neutral mutation with different shifts in gene regulation, and then assessed the actual robustness (see the dashed line in Fig. S22A) as well as the percentage of robustness change (see the dashed line in Fig. S22B). We also performed similar experiments for medium ( $N = 20$ ) and large networks ( $N = 40$ ), as shown in Fig. S23 and Fig. S24.

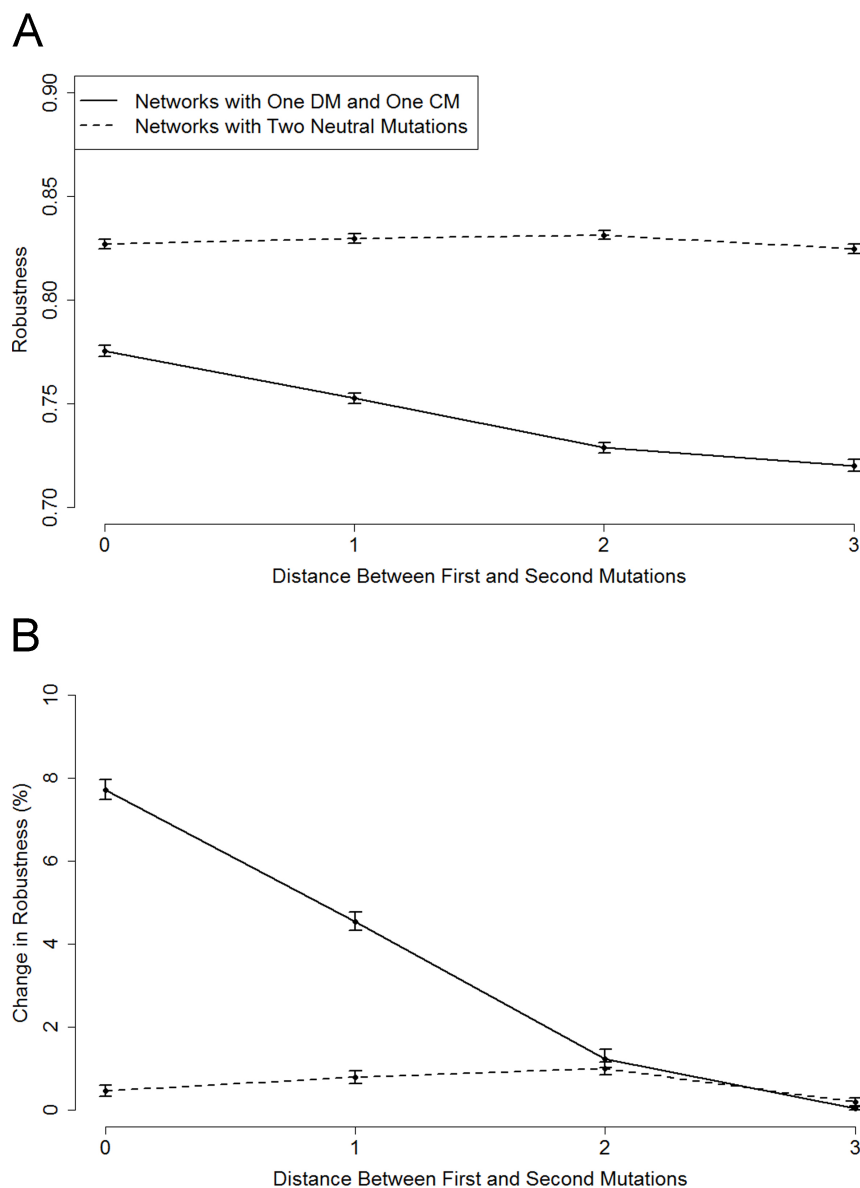

Figure S19: **The impact of distance effect on network robustness (Small Networks)**. For small networks ( $N = 5, c = 0.4$ ), we collected 10,000 sample stable networks that were subjected one deleterious mutation and then restored by one subsequent compensatory mutation that was 0, 1, 2 and 3 steps away from the previous deleterious mutation. The sample networks for control group were collected in a similar way, except that the networks were subjected to two consecutive neutral mutations. Then, we assessed robustness of sample networks at each distance step. The reported results are actual robustness (**A**), and change in robustness (**B**) (the actual robustness was normalised by subtracting the minimal value among all categories, and then divided by the minimal value). The error bars represent 95% confidence intervals based on 100 independent runs.

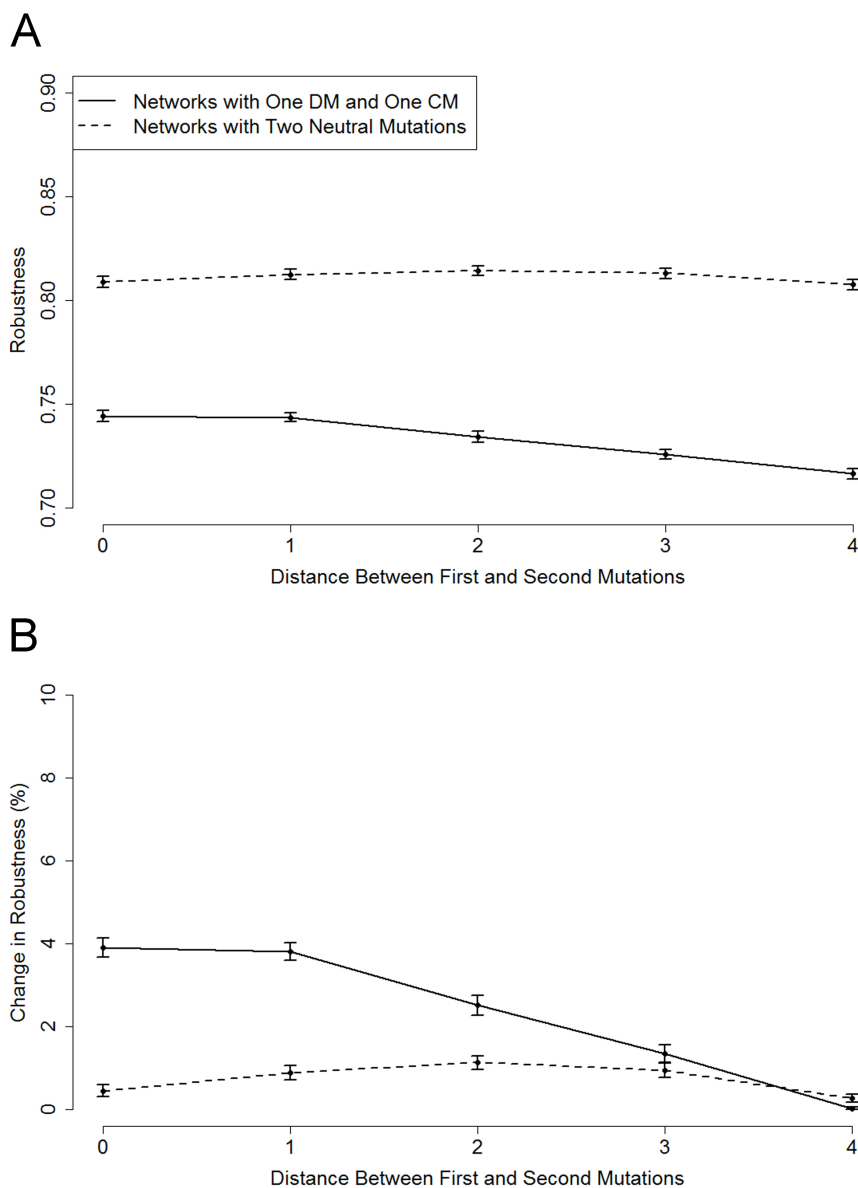

Figure S20: **The impact of distance effect on network robustness (Medium Networks).** For medium networks ( $N = 20, c = 0.2$ ), we collected 10,000 sample stable networks that were subjected one deleterious mutation and then restored by one subsequent compensatory mutation that was 0, 1, 2, 3 and 4 steps away from the previous deleterious mutation. The sample networks for the control group were collected in a similar way, except that the networks were subjected to two consecutive neutral mutations. Then, we assessed the robustness of the sample networks at each distance step. The reported results are actual robustness (A), and change in robustness (B) (the actual robustness was normalised by subtracting the minimal value among all categories, and then dividing by the minimal value). The error bars represent 95% confidence intervals based on 100 independent runs.

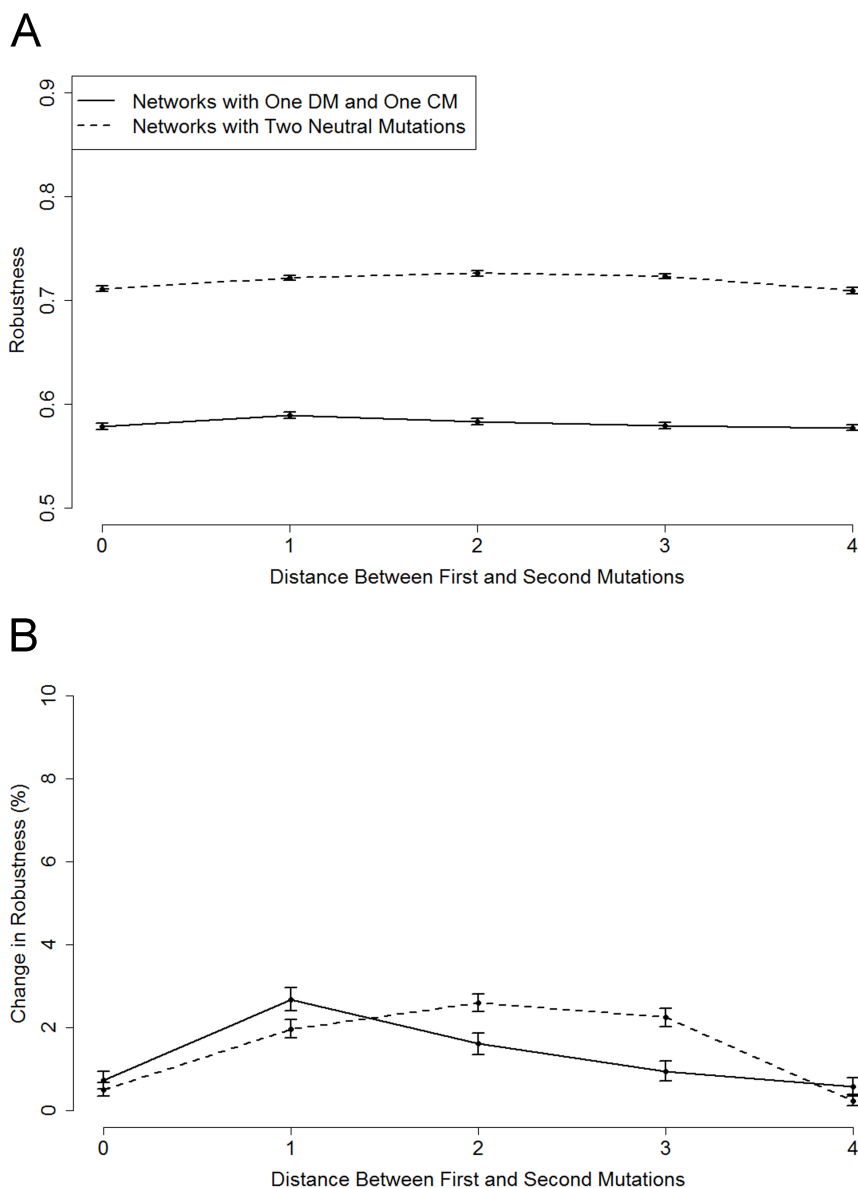

Figure S21: **The impact of distance effect on network robustness (Large Networks).** For large networks ( $N = 40, c = 0.15$ ), we collected 10,000 sample stable networks that were subjected one deleterious mutation and then restored by one subsequent compensatory mutation that was 0, 1, 2, 3 and 4 steps away from the previous deleterious mutation. The sample networks for the control group were collected in a similar way, except that the networks were subjected to two consecutive neutral mutations. Then, we assessed the robustness of the sample networks at each distance step. The reported results are actual robustness (**A**), and change in robustness (**B**) (the actual robustness was normalised by subtracting the minimal value among all categories, and then dividing by the minimal value). The error bars represent 95% confidence intervals based on 100 independent runs.

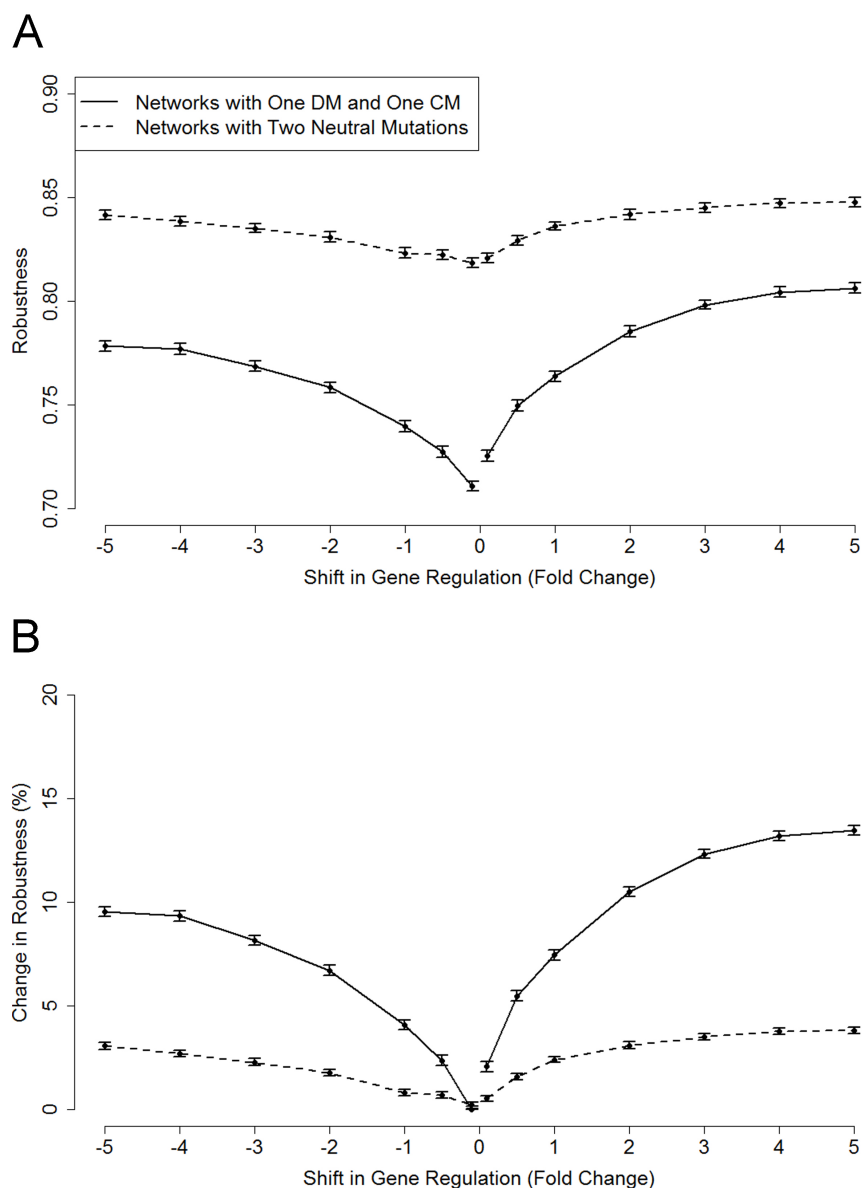

Figure S22: **The impact of mutation size effect on network robustness (Small Networks).** For small networks ( $N = 5, c = 0.4$ ), we collected 10,000 sample stable networks that were subjected one deleterious mutation and then restored by one subsequent compensatory mutation with different shifts in gene regulation from  $[-5, +5]$  (step size 1 and with four additional regulation shifts:  $-0.5, -0.1, 0.1$  and  $0.5$ ). The sample networks for control group were collected in a similar way, except that the networks were subjected to two consecutive neutral mutations. Note that the second neutral mutation has different shifts in gene regulation as the compensatory mutation. Then, we assessed robustness of sample networks at each category. The reported results are actual robustness (**A**), and change in robustness (**B**) (the actual robustness was normalised by subtracting the minimal value among all categories, and then divided by the minimal value). The error bars represent 95% confidence intervals based on 100 independent runs.

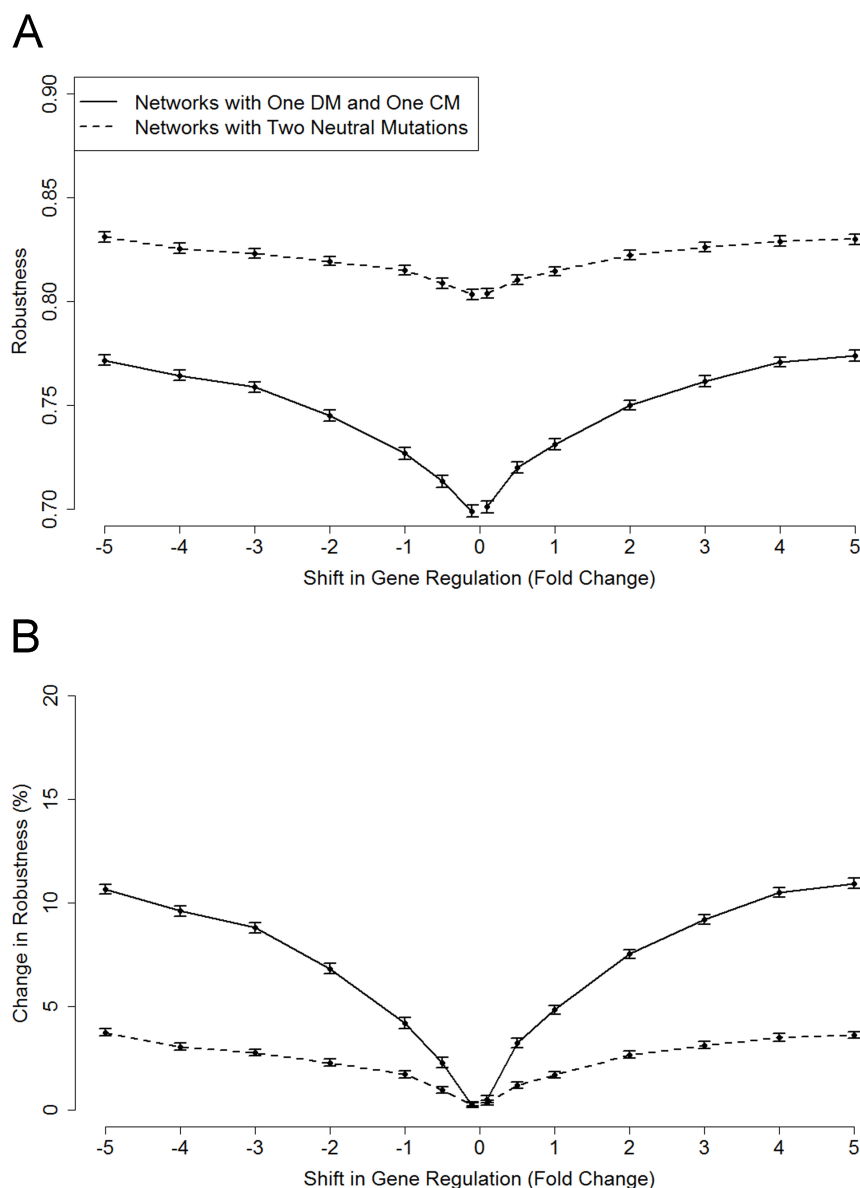

Figure S23: **The impact of mutation size effect on network robustness (Medium Networks)**. For medium networks ( $N = 20, c = 0.2$ ), we collected 10,000 sample stable networks that were subjected one deleterious mutation and then restored by one subsequent compensatory mutation with different shifts in gene regulation from  $[-5, +5]$  (step size 1 and with four additional regulation shifts:  $-0.5, -0.1, 0.1$  and  $0.5$ ). The sample networks for the control group were collected in a similar way, except that the networks were subjected to two consecutive neutral mutations. Note that the second neutral mutation has different shifts in gene regulation to the compensatory mutation. Then, we assessed the robustness of the sample networks at each category. The reported results are actual robustness (**A**), and change in robustness (**B**) (the actual robustness was normalised by subtracting the minimal value among all categories, and then dividing by the minimal value). The error bars represent 95% confidence intervals based on 100 independent runs.



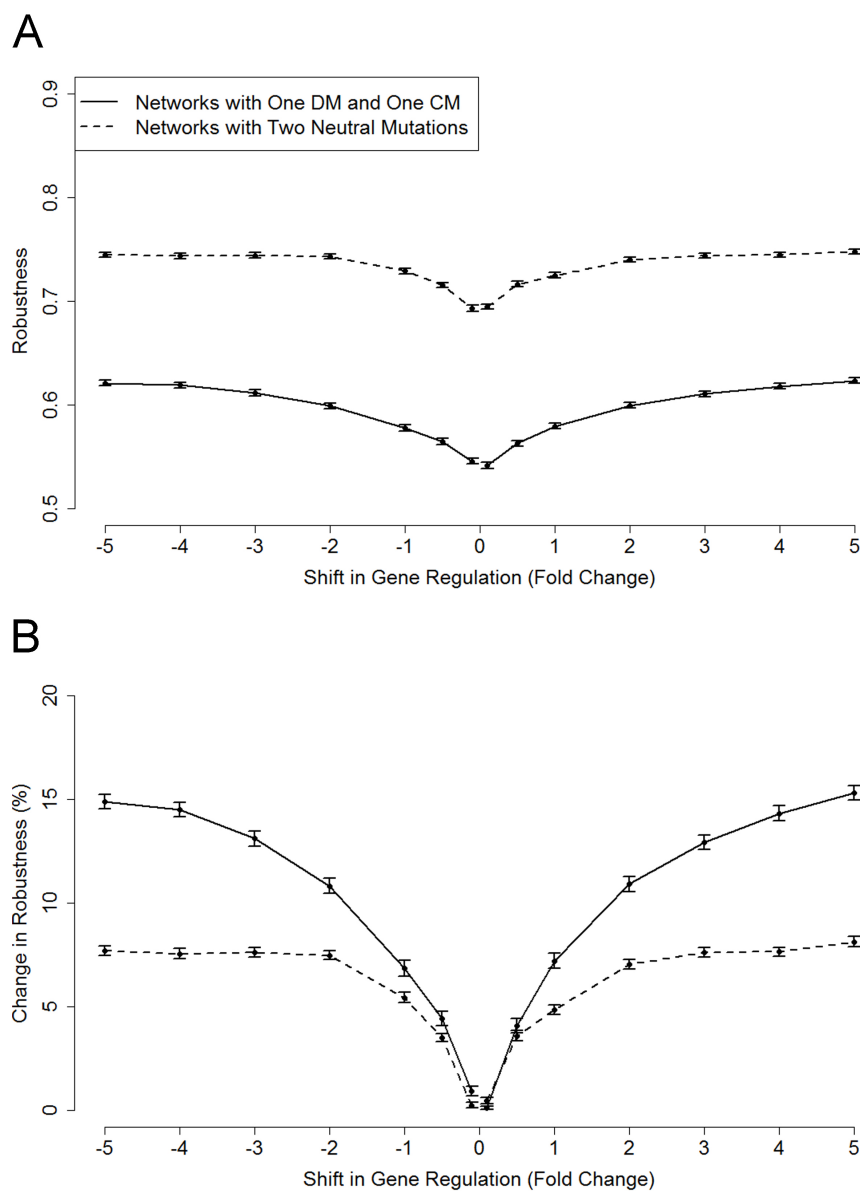

Figure S24: **The impact of mutation size effect on network robustness (Large Networks)**. For large networks ( $N = 40, c = 0.15$ ), we collected 10,000 sample stable networks that were subjected one deleterious mutation and then restored by one subsequent compensatory mutation with different shifts in gene regulation from  $[-5, +5]$  (step size 1 and with four additional regulation shifts:  $-0.5, -0.1, 0.1$  and  $0.5$ ). The sample networks for the control group were collected in a similar way, except that the networks were subjected to two consecutive neutral mutations. Note that the second neutral mutation has different shifts in gene regulation to the compensatory mutation. Then, we assessed the robustness of the sample networks at each category. The reported results are actual robustness (**A**), and change in robustness (**B**) (the actual robustness was normalised by subtracting the minimal value among all categories, and then dividing by the minimal value). The error bars represent 95% confidence intervals based on 100 independent runs.

## Exploring how network connectivity evolves under a relaxed selection regime

In this set of experiments, we investigated whether regulatory complexity (increased network connectivity) could arise under a relaxed selection regime where compensatory mutations could occur and accumulate (see Fig. 4 and Fig. S6).

In the first set of experiments, we tested whether we could observe greater complexity arising using a population pool of 10,000 stable networks of  $N = 10$  genes with a simple ‘Star’ topology (see fig 4, main text). Specifically, the initial population pool was generated using the following rules:

- Randomly select a gene to be the hub node.
- There is at least one edge between the hub node and non-hub nodes (either inward or outward); there is a possibility (0.5) of having both inward and outward edges.
- Each node has a possibility (0.5) of having a self-regulatory edge (including the hub node).
- The value (interaction strength) of each edge is drawn from the standard normal distribution  $N(0,1)$ .

In theory, for network size  $N = 10$ , the minimum connectivity is  $c_{\min} = 0.09$  (9 edges) and the maximum connectivity is  $c_{\max} = 0.28$  (28 edges). In the randomly generated initial population pool used in this paper, the minimum connectivity was  $c_{\min} = 0.10$  (10 edges), the maximum connectivity was  $c_{\max} = 0.26$  (26 edges), the median connectivity was  $\tilde{c} = 0.17$  (17 edges) and the average connectivity was  $\bar{c} \approx 0.17$ . Then, the initial population was evolved for 5,000 generations under strong and relaxed selection regimes: In four scenarios with selection for network stability, the initial population was evolved under: a no mutation and no recombination regime, a mutation but no recombination regime, a recombination but no mutation regime, a mutation and recombination; in three other scenarios, the initial population was evolved under a relaxed selection regime with a frequency of  $1/10$ ,  $1/25$ , and  $1/50$ . The statistical details for connectivity in initial and evolved populations can be found in Table S1. Note that compensatory mutation could only occur during periods of relaxed selection.

In order to further test the hypothesis that relaxed selection can facilitate regulatory complexity, in the second set of experiments, we further investigated how network connectivity evolves under a relaxed selection regime using randomly generated networks (see Fig. S6). Specifically, for a network size  $N = 40$  with connectivity  $c = 0.15$ , we collected 10,000 stable networks, each of which had the same initial gene expression pattern, all activation, i.e.,  $\mathbf{s}(0) = (+1, +1, \dots, +1)$ . This population was then evolved for 5,000 generations, in this case allowing for recombination with other individuals from the same generation. Note that in the previously-described experiments in this paper, a mutation could not change the topology of an individual network; that is, it could not change zero elements into non-zero or *vice versa*. In contrast,

Table S1: Basic statistics of evolved networks with a ‘Star’ topology

|                                 | Medium | Mean | SD ( $E - 2$ ) |
|---------------------------------|--------|------|----------------|
| Init.                           | 0.17   | 0.17 | 2.17           |
| No Mut. & No Rec.               | 0.17   | 0.17 | 3.94           |
| Mut. & No Rec.                  | 0.11   | 0.11 | $4.14E - 13$   |
| Rec. & No Mut.                  | 0.11   | 0.11 | 2.19           |
| Mut. & Rec.                     | 0.21   | 0.20 | 4.42           |
| Mut. & Rec. ( $f_{RS} = 1/10$ ) | 0.30   | 0.30 | 0.43           |
| Mut. & Rec. ( $f_{RS} = 1/25$ ) | 0.34   | 0.34 | 0.47           |
| Mut. & Rec. ( $f_{RS} = 1/50$ ) | 0.31   | 0.31 | 0.51           |

SD: Standard Deviation

recombination can alter the topology if the non-zero sites are different in individual networks. The reported results are the mean network connectivity of all individuals in the population in every 200 generations under different frequencies of relaxed selection. Note that network connectivity was measured in the next generation of network stability selection immediately after the previous relaxed selection; therefore, we only report the results in stable networks.
